# Supplementary material for: Acid-promoted formal [3 + 2] cyclization/N,O-ketalization of in situ generated ortho-alkynyl quinone methides: access to bridged 2,3-cyclopentanoindoline skeletons
Source: Royal Society of Chemistry journal article supplement (doi:10.1039/d2qo00234e), 2022-01-01
Supplement: d2qo00234e1.pdf [file d2qo00234e1.pdf]

## SUPPORTING INFORMATION

### **Acid-promoted Formal [3+2] Cyclization/*N*, *O*-ketalization of *in situ* generated *ortho*-Alkynyl Quinone Methides: Access to Bridged 2,3-Cyclopentanoindoline Skeletons**

Ruo-Nan Wang,<sup>a†</sup> Yan-Hua Ma,<sup>a†</sup> Qing-Qiang Su,<sup>a</sup> Ya-Xin Fan,<sup>a</sup> Yong-Zheng Lv,<sup>a</sup> Xiang-Zhi Zhang,<sup>b</sup> Yan-Lan Wang,<sup>a</sup> Hong-Li Huang,<sup>a\*</sup> and Ji-Yuan Du<sup>a\*</sup>

<sup>a</sup>. College of Chemistry and Chemical Engineering, Liaocheng University, Liaocheng, Shandong 252059, China.

<sup>b</sup>. School of Biotechnology and Health Sciences, Wuyi University, Jiangmen, Guangdong 529020, China.

† These two authors contributed equally.

### **Content**

|                                                                                                                                         |    |
|-----------------------------------------------------------------------------------------------------------------------------------------|----|
| General.....                                                                                                                            | 2  |
| 1. Optimization of the Reaction Conditions. ....                                                                                        | 3  |
| 2. General Procedure for the Synthesis of Bridged 2,3-Cyclopentanoindoline Skeletons and the Spectroscopic Data for the Compounds ..... | 4  |
| 3. General Procedure for the Synthesis derivatives. ....                                                                                | 19 |
| 4. Relative Configuration Assignment of 4 and 5 by X-Ray Crystallographic Analysis                                                      | 22 |
| 5. References.....                                                                                                                      | 24 |
| 6. Copies of NMR Spectra .....                                                                                                          | 24 |

## General

All moisture or oxygen-sensitive reactions were carried out under an argon atmosphere in oven flasks. The solvents used were purified by distillation over the drying agents indicated and were transferred under argon: THF (Na), CH<sub>2</sub>Cl<sub>2</sub> (CaH<sub>2</sub>), toluene (Na), ClCH<sub>2</sub>CH<sub>2</sub>Cl (CaH<sub>2</sub>). The products were purified by flash column chromatography on silica gel (200-300 meshes) from the Anhui Liangchen Silicon Material Company in China. <sup>1</sup>H NMR and <sup>13</sup>C NMR spectra were recorded in CDCl<sub>3</sub> on a Varian 500 MHz instrument. Chemical shifts were denoted in ppm ( $\delta$ ), and calibrated by using residual undeuterated solvent (CDCl<sub>3</sub> (7.27 ppm), DMSO-*d*<sub>6</sub> (2.50 ppm) or tetramethylsilane (0.00 ppm)) as internal reference for <sup>1</sup>H NMR and the deuterated solvent (CDCl<sub>3</sub> (77.00 ppm), DMSO-*d*<sub>6</sub> (39.51 ppm) or tetramethylsilane (0.00 ppm)) as internal standard for <sup>13</sup>C NMR. The following abbreviations were used to explain the multiplicities: s = singlet, d = doublet, t = triplet, q = quartet, br = broad, td = triple doublet, dt = double triplet, m = multiplet. The MS data were obtained with ESI technique, and the relative intensity (%) is given in brackets. High-resolution mass spectral analysis (HRMS) data were measured on a Bruker ApexII mass spectrometer by means of the ESI technique. The IR spectra were recorded on Nicolet Nexus 670 FT-IR spectrometer. The X-ray single-crystal determination was performed on a Bruker Smart 1000 CCD X-ray single crystal diffractometer. Compound **1a** was prepared according to the reported literature.<sup>1,2</sup>

## 1. Optimization of the Reaction Conditions.

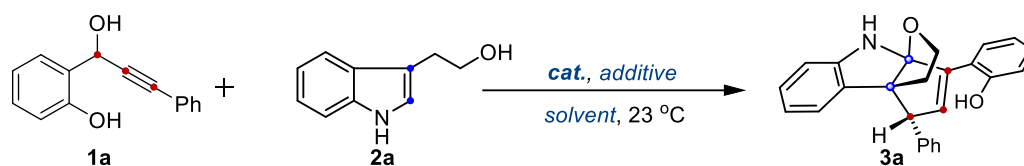

**Table 1. Optimization of the Reaction Conditions**

| entry           | catalyst                          | time/h | solvent                         | additive | yield (%) <sup>a</sup> | d.r. <sup>b</sup> |
|-----------------|-----------------------------------|--------|---------------------------------|----------|------------------------|-------------------|
| 1               | AlCl <sub>3</sub>                 | 12     | CH <sub>3</sub> CN              | ---      | 31                     | 6:1               |
| 2               | Bi(OTf) <sub>3</sub>              | 12     | CH <sub>3</sub> CN              | ---      | 37                     | 5:1               |
| 3               | BF <sub>3</sub> ·OEt <sub>2</sub> | 12     | CH <sub>3</sub> CN              | ---      | 42                     | 6:1               |
| 4               | Al(OTf) <sub>3</sub>              | 12     | CH <sub>3</sub> CN              | ---      | 28                     | 4:1               |
| 5               | Cu(OTf) <sub>2</sub>              | 12     | CH <sub>3</sub> CN              | ---      | 0                      | ---               |
| 6               | AgOTf                             | 12     | CH <sub>3</sub> CN              | ---      | 0                      | ---               |
| 7               | (-)-CSA                           | 12     | CH <sub>3</sub> CN              | ---      | 10                     | 4:1               |
| 8               | TFA                               | 12     | CH <sub>3</sub> CN              | ---      | trace                  | ---               |
| 9               | AlCl <sub>3</sub>                 | 12     | DCE                             | ---      | 18                     | 10:1              |
| 10              | AlCl <sub>3</sub>                 | 12     | Toluene                         | ---      | 16                     | 8:1               |
| 11              | CPA                               | 12     | Toluene                         | ---      | 46                     | 11:1              |
| 12              | PA                                | 24     | CH <sub>3</sub> CN              | ---      | 0                      | ---               |
| 13              | PA                                | 24     | CHCl <sub>3</sub>               | 3 Å MS   | 49                     | 6:1               |
| 14              | PA                                | 24     | DCE                             | 3 Å MS   | 37                     | 11:1              |
| 15              | PA                                | 24     | CH <sub>2</sub> Cl <sub>2</sub> | 3 Å MS   | 34                     | 8:1               |
| 18              | PA                                | 12     | Toluene                         | 3 Å MS   | 51                     | 8:1               |
| 19              | PA                                | 12     | PhF                             | 3 Å MS   | 21                     | 8:1               |
| 20              | CPA                               | 12     | PhCl                            | 4 Å MS   | 46                     | 8:1               |
| 21 <sup>c</sup> | CPA(CuI)                          | 12     | PhCl                            | 3 Å MS   | 57                     | 8:1               |
| 22              | CPA(Ag <sub>2</sub> O)            | 12     | PhCl                            | 3 Å MS   | 23                     | 8:1               |
| 23              | CPA                               | 12     | PhF                             | 3 Å MS   | 58                     | 8:1               |
| 24              | CPA                               | 12     | HFIP                            | 3 Å MS   | 0                      | ---               |
| 25              | PA                                | 24     | PhCl                            | 3 Å MS   | 57                     | 20:1              |
| 26 <sup>d</sup> | PA                                | 72     | PhCl                            | 3 Å MS   | 78                     | >20:1             |

Unless otherwise noted, all reactions were conducted with 0.20 mmol of **1** (1.0 equiv.), 0.30 mmol of **2** (1.5 equiv.), 10 mol% of catalyst and 3 Å MS (50 mg, if applicable) in the solvent (2.0 mL) at 23 °C for the indicated time. <sup>a</sup>Yield of isolated **3a**. Only unidentified by-products were obtained. <sup>b</sup>Determined by <sup>1</sup>H NMR analysis. <sup>c</sup>The ratio of CPA and CuI is 2:1. <sup>d</sup>Another portion of 10 mol%

phosphonic acid was added after stirred for 24 hours. TFA = trifluoroacetic acid, CSA = camphorsulfonic acid, PA = 1,1'-binaphthyl-2,2'-diylhydrogenphosphate, CPA = R(-)-1,1'-binaphthyl-2,2'-diyl hydrogenphosphate.

- Preliminary exploration on enantioselective version:

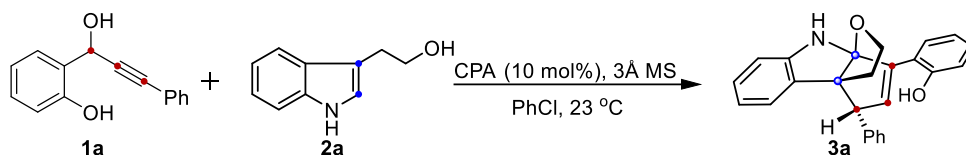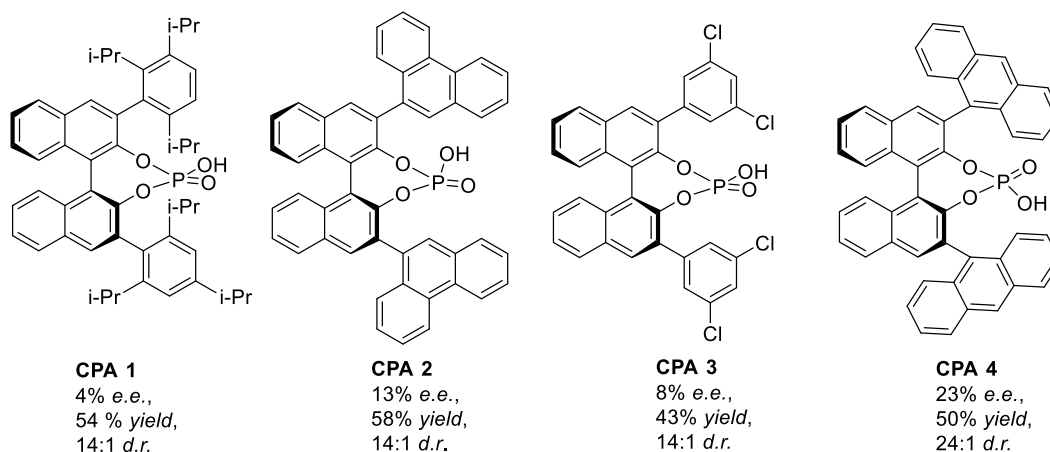

A mixture of **1a** (44.8 mg, 0.20 mmol) and **2a** (48.2 mg, 0.30 mmol) was dissolved in chlorobenzene (1.0 mL), to the solution of the mixture was added **CPA** (0.02 mmol) and 3Å MS (50 mg) at 23 °C and stirred for 24 h. The reaction mixture without aqueous workup was directly purified by flash column chromatography on silica gel [gradient eluent: 15:1~10:1 petroleum ether/EtOAc] to give the chiral product **3a** as a solid. **Chiral HPLC:** (Chiralpak IB3, 5% *i*-PrOH, 95% hexane, 1.00 mL min<sup>-1</sup>, λ = 254 nm) τ<sub>R</sub> (minor) = 9.42 min, τ<sub>R</sub> (major) = 13.95 min.

## 2. General Procedure for the Synthesis of Bridged 2, 3-Cyclopentanoindoline Skeletons and the Spectroscopic Data for the Compounds

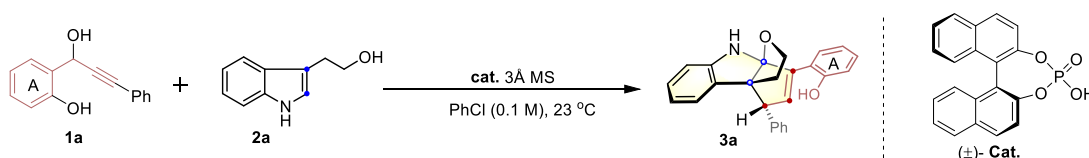

### For 0.2 mmol Scale:

A mixture of **1a** (44.8 mg, 0.20 mmol) and **2a** (48.2 mg, 0.30 mmol) was dissolved in

chlorobenzene (1.0 mL), to the solution of the mixture was added **Cat.** phosphonic acid (6.9 mg, 0.02 mmol) and 3Å MS (50 mg) at 23 °C and stirred for 24 h, then another portion of phosphonic acid (6.9 mg, 0.02 mmol) was added and stirred at 23 °C for another 48 h. The reaction mixture without aqueous workup was directly purified by flash column chromatography on silica gel [gradient eluent: 15:1~10:1 petroleum ether/EtOAc] to give the product **3a** as a solid (57.2 mg, 0.15 mmol) in 78% yield. (Note: Each 0.2 mmol scale reaction requires about 20 grams of silica gel.)

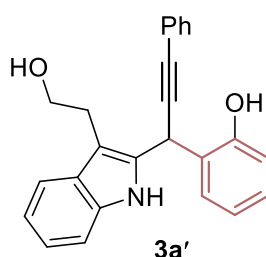

**Compound 3a'**: (92% yield, [15:1 petroleum ether/EtOAc], yellow crystal, mp. = 162.5 °C):

**<sup>1</sup>H NMR** (500 MHz, Chloroform-*d*)  $\delta$  = 7.89 (s, 1H), 7.79 (dd,  $J$  = 7.6, 1.7 Hz, 1H), 7.51 (d,  $J$  = 7.8 Hz, 1H), 7.43 (dd,  $J$  = 6.8, 3.0 Hz, 2H), 7.28 (dt,  $J$  = 4.9, 2.5 Hz, 3H), 7.22 (s, 1H), 7.17 (td,  $J$  = 7.7, 1.7 Hz, 1H), 7.13 (t,  $J$  = 7.5 Hz, 1H), 7.07 (t,  $J$  = 7.4 Hz, 1H), 7.00 (t,  $J$  = 7.5 Hz, 1H), 6.75 (d,  $J$  = 8.0 Hz, 1H), 5.87 (s, 1H), 4.00 (dt,  $J$  = 9.8, 4.7 Hz, 1H), 3.92 (dt,  $J$  = 9.7, 4.8 Hz, 1H), 3.27 – 3.09 ppm (m, 2H); **<sup>13</sup>C NMR** (126 MHz, CDCl<sub>3</sub>)  $\delta$  = 153.4, 135.6, 133.8, 131.7, 129.2, 128.9, 128.4, 128.3, 128.1, 125.1, 122.8, 122.1, 121.1, 119.5, 119.8, 118.5, 117.1, 111.0, 108.4, 87.2, 85.0, 62.7, 30.5, 27.0 ppm; **ATR-FTIR** (cm<sup>-1</sup>):  $\bar{\nu}$  = 3407, 2921, 1455, 1037, 740, 691 cm<sup>-1</sup>; **HRMS** (ESI):  $m/z$  calcd for C<sub>25</sub>H<sub>22</sub>NO<sub>2</sub>: 368.1651; found: 368.1661 [ $M + H$ ]<sup>+</sup>.

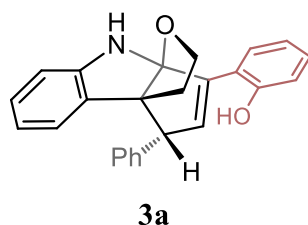

**Compound 3a**: (78% yield, d.r. > 20:1, [15:1 petroleum ether/EtOAc], white crystal, mp. = 102.5 °C):

**<sup>1</sup>H NMR** (500 MHz, Chloroform-*d*)  $\delta$  = 9.29 (s, 1H), 7.42 (t,  $J$  = 7.4 Hz, 2H), 7.34 (dd,  $J$  = 12.0, 7.1 Hz, 4H), 7.28 (s, 2 H), 7.25 (m,  $J$  = 1.6 Hz, 2H), 6.61 (d,  $J$  = 7.8 Hz, 1H), 6.08 (d,  $J$  = 2.3 Hz, 2H), 4.80 (s, 1H), 4.39 (d,  $J$  = 2.2 Hz, 1H), 4.03 (ddd,  $J$  = 8.6, 6.7, 4.5 Hz, 1H), 3.88 (td,  $J$  = 8.5, 5.8 Hz, 1H), 2.03 – 1.93 (m, 1H), 1.81 ppm (ddd,  $J$  = 12.6, 5.7, 4.6 Hz, 1H); **<sup>13</sup>C NMR** (126 MHz, CDCl<sub>3</sub>)  $\delta$  = 154.8, 148.5, 141.3, 140.4, 135.3, 134.9, 131.5, 130.4, 128.7, 128.6, 128.6, 127.3, 123.7, 120.2, 119.9, 119.8, 117.8, 116.3, 110.2, 69.3, 67.7, 59.0, 37.4 ppm; **ATR-FTIR** (cm<sup>-1</sup>):  $\bar{\nu}$  = 3391, 3272, 1482, 1234, 998, 733cm<sup>-1</sup>; **HRMS** (ESI):  $m/z$  calcd for C<sub>25</sub>H<sub>22</sub>NO<sub>2</sub>: 368.1651; found: 368.1661 [ $M + H$ ]<sup>+</sup>.

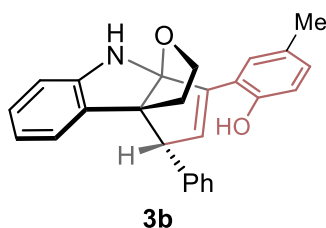

**Compound 3b:** (78% yield, d.r. > 20:1, [15:1 petroleum ether/EtOAc], pink oil):

**<sup>1</sup>H NMR** (500 MHz, Chloroform-*d*)  $\delta$  = 9.07 (s, 1H), 7.40 (t,  $J$  = 7.4 Hz, 3H), 7.33 (dd,  $J$  = 13.0, 7.1 Hz, 4H), 7.19 – 7.00 (m, 2H), 6.88 (t,  $J$  = 8.8 Hz, 2H), 6.59 (d,  $J$  = 7.8 Hz, 1H), 6.06 (d,  $J$  = 2.1 Hz, 1H), 4.79 (s, 1H), 4.43 – 4.33 (m, 1H), 4.01 (ddd,  $J$  = 8.7, 6.8, 4.5 Hz, 1H), 3.86 (dd,  $J$  = 8.5, 5.9 Hz, 1H), 2.26 (s, 3H), 1.86 – 1.71 ppm (m, 1H); **<sup>13</sup>C NMR** (126 MHz, CDCl<sub>3</sub>)  $\delta$  = 152.6, 148.6, 141.4, 140.5, 135.0, 134.9, 131.7, 131.1, 128.9, 128.7, 128.6, 128.6, 127.2, 123.7, 120.2, 119.5, 117.7, 116.4, 110.2, 69.3, 67.6, 59.0, 37.4, 30.9, 20.3 ppm; **ATR-FTIR** (cm<sup>-1</sup>):  $\bar{\nu}$  = 3226, 1607, 1464, 1034, 902, 726 cm<sup>-1</sup>; **HRMS** (ESI):  $m/z$  calcd for C<sub>26</sub>H<sub>24</sub>NO<sub>2</sub>: 382.1807; found: 382.1812 [ $M + H$ ]<sup>+</sup>.

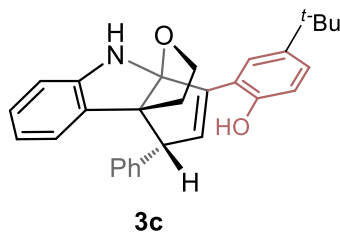

**Compound 3c:** (50% yield, d.r. >20:1, [15:1 petroleum ether/EtOAc], brown oil):

**<sup>1</sup>H NMR** (500 MHz, Chloroform-*d*)  $\delta$  = 9.24 (s, 1H), 7.43 (t,  $J$  = 7.5 Hz, 2H), 7.39 – 7.32 (m, 5H), 7.27 (d,  $J$  = 2.4 Hz, 1H), 7.15 (td,  $J$  = 8.6, 7.8, 1.0 Hz, 1H), 6.97 (d,  $J$  =

8.6 Hz, 1H), 6.91 (t,  $J = 7.4$  Hz, 1H), 6.63 (d,  $J = 7.8$  Hz, 1H), 6.12 (d,  $J = 2.3$  Hz, 1H), 4.87 (s, 1H), 4.43 (d,  $J = 2.2$  Hz, 1H), 4.04 (ddd,  $J = 8.6, 6.7, 4.7$  Hz, 1H), 3.90 (td,  $J = 8.4, 5.9$  Hz, 1H), 2.01 (ddd,  $J = 12.7, 8.2, 6.8$  Hz, 1H), 1.89 – 1.73 (m, 1H), 1.32 ppm (s, 9H);  $^{13}\text{C NMR}$  (126 MHz,  $\text{CDCl}_3$ )  $\delta = 152.5, 148.6, 142.5, 141.7, 140.5, 135.0, 128.7, 128.7, 128.6, 127.9, 127.7, 127.3, 123.7, 120.1, 118.8, 117.5, 116.3, 110.1, 69.1, 67.8, 59.1, 37.5, 34.0, 31.5$  ppm; **ATR-FTIR** ( $\text{cm}^{-1}$ ):  $\bar{\nu} = 3258, 2959, 1607, 1483, 1033, 729$   $\text{cm}^{-1}$ ; **HRMS** (ESI):  $m/z$  calcd for  $\text{C}_{29}\text{H}_{30}\text{NO}_2$ : 424.2277; found: 424.2285 [ $M + \text{H}$ ] $^+$ .

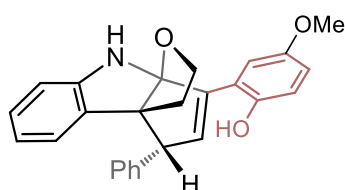

**3d**

**Compound 3d:** (40% yield, d.r. >20:1, [10:1 petroleum ether/EtOAc], brown oil):

$^1\text{H NMR}$  (500 MHz, Chloroform- $d$ )  $\delta = 8.89$  (s, 1H), 7.41 (t,  $J = 7.4$  Hz, 2H), 7.37 – 7.29 (m, 4H), 7.16 – 7.09 (m, 1H), 6.97 – 6.83 (m, 3H), 6.79 (d,  $J = 3.0$  Hz, 1H), 6.61 (d,  $J = 7.8$  Hz, 1H), 6.08 (d,  $J = 2.3$  Hz, 1H), 4.82 (s, 1H), 4.38 (d,  $J = 2.1$  Hz, 1H), 4.02 (ddd,  $J = 8.5, 6.7, 4.3$  Hz, 1H), 3.86 (td,  $J = 8.6, 5.8$  Hz, 1H), 3.75 (s, 3H), 1.97 (ddd,  $J = 12.7, 8.5, 6.8$  Hz, 1H), 1.84 – 1.76 ppm (m, 1H);  $^{13}\text{C NMR}$  (126 MHz,  $\text{CDCl}_3$ )  $\delta = 152.9, 148.8, 148.5, 141.2, 140.4, 135.3, 134.8, 128.7, 128.6, 128.6, 127.3, 123.7, 120.2, 120.1, 118.6, 116.4, 116.3, 115.7, 110.1, 69.3, 67.7, 58.9, 55.8, 37.4$  ppm; **ATR-FTIR** ( $\text{cm}^{-1}$ ):  $\bar{\nu} = 3262, 1607, 1488, 1207, 1033, 748$   $\text{cm}^{-1}$ ; **HRMS** (ESI):  $m/z$  calcd for  $\text{C}_{26}\text{H}_{24}\text{NO}_3$ : 398.1756; found: 398.1762 [ $M + \text{H}$ ] $^+$ .

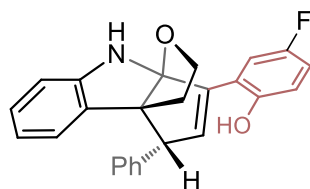

**3e**

**Compound 3e:** (33% yield, d.r. >20:1, [10:1 petroleum ether/EtOAc], brown oil):

**<sup>1</sup>H NMR** (500 MHz, Chloroform-*d*)  $\delta$  = 9.13 (s, 1H), 7.47 – 7.37 (m, 2H), 7.36 – 7.28 (m, 4H), 7.12 (td,  $J$  = 7.8, 1.1 Hz, 1H), 6.96 (ddd,  $J$  = 9.2, 7.2, 2.6 Hz, 2H), 6.94 – 6.84 (m, 2H), 6.61 (d,  $J$  = 7.8 Hz, 1H), 6.08 (d,  $J$  = 2.3 Hz, 1H), 4.79 (s, 1H), 4.37 (d,  $J$  = 2.2 Hz, 1H), 4.02 (ddd,  $J$  = 8.6, 6.8, 4.2 Hz, 1H), 3.85 (td,  $J$  = 8.7, 5.7 Hz, 1H), 1.97 (ddd,  $J$  = 12.7, 8.6, 6.8 Hz, 1H), 1.80 ppm (ddd,  $J$  = 12.6, 5.6, 4.3 Hz, 1H); **<sup>13</sup>C NMR** (126 MHz, CDCl<sub>3</sub>)  $\delta$  = 157.3, 155.4, 150.9, 148.5, 140.4, 140.1, 136.1, 134.6, 128.8, 128.7, 128.6, 127.4, 123.7, 120.3, 118.8, 117.0, 116.8, 116.2, 110.2, 69.4, 67.8, 58.8, 37.4 ppm; **<sup>19</sup>F NMR** (470 MHz, CDCl<sub>3</sub>)  $\delta$  = -125.6 ppm; **ATR-FTIR** (cm<sup>-1</sup>):  $\bar{\nu}$  = 3236, 2874, 1607, 1484, 1033, 728 cm<sup>-1</sup>; **HRMS** (ESI):  $m/z$  calcd for C<sub>25</sub>H<sub>21</sub>FNO<sub>2</sub>: 386.1556; found: 386.1564 [ $M + H$ ]<sup>+</sup>.

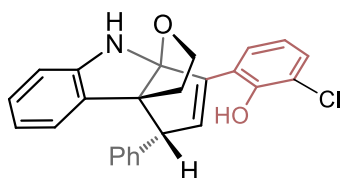

**3f**

**Compound 3f:** (51% yield, d.r. = 12:1, [15:1 petroleum ether/EtOAc], white crystal), mp. = 61.2 °C): **<sup>1</sup>H NMR** (500 MHz, Chloroform-*d*)  $\delta$  = 7.45 – 7.40 (m, 2H), 7.39 – 7.30 (m, 5H), 7.22 (dd,  $J$  = 7.7, 1.6 Hz, 1H), 7.14 (td,  $J$  = 7.7, 1.1 Hz, 1H), 6.93 – 6.87 (m, 1H), 6.83 (t,  $J$  = 7.8 Hz, 1H), 6.63 (d,  $J$  = 7.8 Hz, 1H), 6.14 (d,  $J$  = 2.3 Hz, 1H), 4.80 (s, 1H), 4.40 (d,  $J$  = 2.2 Hz, 1H), 4.04 (ddd,  $J$  = 8.7, 6.8, 4.2 Hz, 1H), 3.92 – 3.79 (m, 1H), 1.99 (ddd,  $J$  = 12.7, 8.7, 6.8 Hz, 1H), 1.81 ppm (ddd,  $J$  = 12.7, 5.6, 4.2 Hz, 1H); **<sup>13</sup>C NMR** (126 MHz, CDCl<sub>3</sub>)  $\delta$  = 149.6, 147.5, 139.5, 139.1, 135.6, 133.5, 129.5, 128.7, 127.7, 127.6, 127.5, 126.3, 122.7, 121.4, 120.7, 119.3, 119.2, 115.4, 109.2, 68.5, 66.8, 57.83, 36.3 ppm; **ATR-FTIR** (cm<sup>-1</sup>):  $\bar{\nu}$  = 3389, 2950, 1604, 1451, 907, 731 cm<sup>-1</sup>; **HRMS** (ESI):  $m/z$  calcd for C<sub>25</sub>H<sub>21</sub>ClNO<sub>2</sub>: 402.1261; found: 402.1270 [ $M + H$ ]<sup>+</sup>.

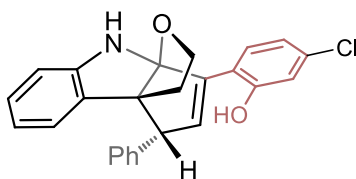

**3g**



**Compound 3g:** (61% yield, d.r. >20:1, [10:1 petroleum ether/EtOAc], brown crystal, mp. = 160.9 °C):

**<sup>1</sup>H NMR** (500 MHz, Chloroform-*d*)  $\delta$  = 9.55 (s, 1H), 7.46 – 7.38 (m, 2H), 7.33 (q,  $J$  = 6.7, 5.8 Hz, 4H), 7.19 – 7.09 (m, 2H), 7.00 (d,  $J$  = 2.1 Hz, 1H), 6.89 (t,  $J$  = 7.4 Hz, 1H), 6.85 (dd,  $J$  = 8.2, 2.1 Hz, 1H), 6.62 (d,  $J$  = 7.8 Hz, 1H), 6.06 (d,  $J$  = 2.3 Hz, 1H), 4.75 (s, 1H), 4.37 (d,  $J$  = 2.2 Hz, 1H), 4.03 (ddd,  $J$  = 8.6, 6.8, 4.3 Hz, 1H), 3.86 (td,  $J$  = 8.6, 5.8 Hz, 1H), 1.98 (ddd,  $J$  = 12.7, 8.5, 6.8 Hz, 1H), 1.88 – 1.74 ppm (m, 1H); **<sup>13</sup>C NMR** (126 MHz, CDCl<sub>3</sub>)  $\delta$  = 155.6, 148.4, 140.4, 140.1, 135.7, 135.6, 134.6, 132.2, 128.8, 128.7, 128.6, 127.4, 123.7, 120.4, 120.2, 118.5, 118.0, 116.1, 110.2, 69.4, 67.7, 58.9, 37.4 ppm; **ATR-FTIR** (cm<sup>-1</sup>):  $\bar{\nu}$  = 3262, 1592, 1247, 1028, 929, 749 cm<sup>-1</sup>; **HRMS** (ESI): m/z calcd for C<sub>25</sub>H<sub>21</sub>ClNO<sub>2</sub>: 402.1261; found: 402.1267 [*M* + H]<sup>+</sup>.

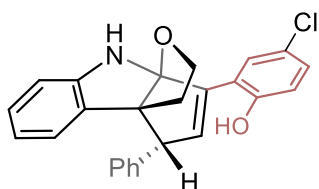

**3h**

**Compound 3h:** (62% yield, d.r. = 10:1, [15:1 petroleum ether/EtOAc], white crystal, mp. = 69.8 °C):

**<sup>1</sup>H NMR** (500 MHz, Chloroform-*d*)  $\delta$  = 9.36 (s, 1H), 7.41 (t,  $J$  = 7.5 Hz, 2H), 7.32 (q,  $J$  = 6.1 Hz, 4H), 7.24 – 7.17 (m, 2H), 7.13 (t,  $J$  = 7.5 Hz, 1H), 6.95 – 6.85 (m, 3H), 6.61 (d,  $J$  = 7.8 Hz, 1H), 6.08 (d,  $J$  = 2.0 Hz, 1H), 4.40 – 4.35 (m, 1H), 4.07 – 3.97 (m, 1H), 3.85 (td,  $J$  = 8.6, 5.9 Hz, 1H), 2.01 – 1.90 (m, 1H), 1.80 ppm (dt,  $J$  = 12.6, 5.0 Hz, 1H); **<sup>13</sup>C NMR** (126 MHz, CDCl<sub>3</sub>)  $\delta$  = 153.6, 148.4, 140.3, 140.0, 136.3, 134.6, 130.6, 130.1, 128.8, 128.3, 128.5, 127.4, 124.5, 123.7, 121.4, 120.3, 119.2, 116.2, 110.2, 69.5, 67.8, 58.9, 37.4 ppm; **ATR-FTIR** (cm<sup>-1</sup>):  $\bar{\nu}$  = 3138, 2912, 1479, 1255, 985, 711 cm<sup>-1</sup>; **HRMS** (ESI): m/z calcd for C<sub>25</sub>H<sub>21</sub>ClNO<sub>2</sub>: 402.1261; found: 402.1269 [*M* + H]<sup>+</sup>.

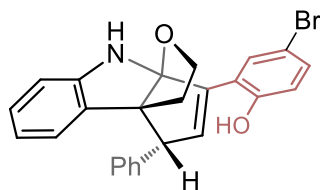

**3i**

**Compound 3i:** (40% yield, d.r. = 12:1, [15:1 petroleum ether/EtOAc], white crystal, mp. = 160.2 °C):

**<sup>1</sup>H NMR** (500 MHz, Chloroform-*d*)  $\delta$  = 9.39 (s, 1H), 7.41 (t,  $J$  = 7.5 Hz, 2H), 7.38 – 7.29 (m, 4H), 7.18 – 7.01 (m, 2H), 6.98 – 6.78 (m, 3H), 6.63 (d,  $J$  = 7.8 Hz, 1H), 6.09 (d,  $J$  = 2.2 Hz, 1H), 4.75 (s, 1H), 4.38 (s,  $J$  = 2.1 Hz, 1H), 4.03 (ddd,  $J$  = 8.6, 6.8, 4.3 Hz, 1H), 3.86 (td,  $J$  = 8.6, 5.8 Hz, 1H), 1.98 (ddd,  $J$  = 12.7, 8.5, 6.9 Hz, 1H), 1.86 – 1.68 ppm (m, 1H); **<sup>13</sup>C NMR** (126 MHz, CDCl<sub>3</sub>)  $\delta$  = 154.1, 148.4, 140.2, 140.0, 136.3, 134.6, 133.5, 133.0, 128.8, 128.7, 128.6, 127.4, 123.7, 122.0, 120.4, 119.7, 116.2, 111.6, 110.3, 69.5, 67.8, 58.9, 37.4 ppm; **ATR-FTIR** (cm<sup>-1</sup>):  $\bar{\nu}$  = 3268, 2879, 1607, 1478, 1031, 726 cm<sup>-1</sup>; **HRMS** (ESI):  $m/z$  calcd for C<sub>25</sub>H<sub>21</sub>BrNO<sub>2</sub>: 446.0756; found: 446.0760 [ $M + H$ ]<sup>+</sup>.

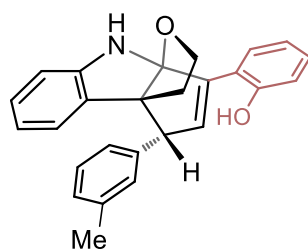

**3j**

**Compound 3j:** (70% yield, d.r. = 10:1, [10:1 petroleum ether/EtOAc], brown oil):

**<sup>1</sup>H NMR** (500 MHz, Chloroform-*d*)  $\delta$  = 9.34 (s, 1H), 7.34 (dd,  $J$  = 7.6, 1.4 Hz, 1H), 7.32 – 7.25 (m, 3H), 7.20 – 7.10 (m, 4H), 7.01 (dd,  $J$  = 8.2, 1.2 Hz, 1H), 6.94 – 6.85 (m, 2H), 6.61 (d,  $J$  = 7.8 Hz, 1H), 6.08 (d,  $J$  = 2.4 Hz, 1H), 4.80 (s, 1H), 4.36 (d,  $J$  = 2.4 Hz, 1H), 4.08 – 3.99 (m, 1H), 3.88 (td,  $J$  = 8.5, 5.7 Hz, 1H), 2.42 (s, 3H), 2.01 (ddd,  $J$  = 12.6, 8.4, 6.7 Hz, 1H), 1.83 ppm (ddd,  $J$  = 12.7, 5.8, 4.4 Hz, 1H); **<sup>13</sup>C NMR** (126 MHz, CDCl<sub>3</sub>)  $\delta$  = 154.9, 148.6, 141.1, 140.4, 138.5, 135.6, 135.0, 131.5, 130.5, 129.3, 128.6, 128.6, 128.1, 125.8, 123.8, 120.3, 120.0, 119.9, 117.9, 116.4, 110.2, 69.3, 67.7, 59.0, 37.5, 21.6 ppm; **ATR-FTIR** (cm<sup>-1</sup>):  $\bar{\nu}$  = 3234, 2879, 1606, 1482,

1255, 730  $\text{cm}^{-1}$ ; **HRMS** (ESI):  $m/z$  calcd for  $\text{C}_{26}\text{H}_{24}\text{NO}_2$ : 382.1807; found: 382.1810  $[M + \text{H}]^+$ .

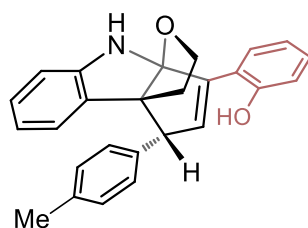

**3k**

**Compound 3k:** (49% yield, d.r. >20:1, [15:1 petroleum ether/EtOAc], brown oil):

**$^1\text{H}$  NMR** (500 MHz, Chloroform-*d*)  $\delta$  = 9.31 (s, 1H), 7.29 (dd,  $J$  = 16.1, 7.2 Hz, 4H), 7.22 (d,  $J$  = 7.6 Hz, 3H), 7.18 – 7.09 (m, 1H), 6.99 (d,  $J$  = 8.1 Hz, 1H), 6.95 – 6.81 (m, 1H), 6.59 (d,  $J$  = 7.8 Hz, 1H), 6.05 (d,  $J$  = 2.2 Hz, 1H), 4.78 (s, 1H), 4.35 (s, 1H), 4.08 – 3.97 (m, 1H), 3.92 – 3.81 (m, 1H), 2.38 (s, 3H), 2.08 – 1.91 (m, 1H), 1.86 – 1.74 ppm (m, 1H);  **$^{13}\text{C}$  NMR** (126 MHz,  $\text{CDCl}_3$ )  $\delta$  = 154.9, 148.5, 141.1, 137.3, 136.9, 135.6, 135.0, 131.5, 130.4, 129.4, 128.5, 128.5, 123.7, 120.2, 119.9, 119.9, 117.8, 116.3, 110.2, 69.2, 67.6, 58.7, 37.4, 30.8, 21.1 ppm; **ATR-FTIR** ( $\text{cm}^{-1}$ ):  $\bar{\nu}$  = 3239, 1732, 1403, 1251, 1032, 735  $\text{cm}^{-1}$ ; **HRMS** (ESI):  $m/z$  calcd for  $\text{C}_{26}\text{H}_{24}\text{NO}_2$ : 382.1807; found: 382.1816  $[M + \text{H}]^+$ .

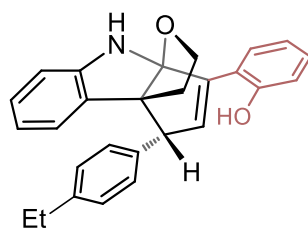

**3l**

**Compound 3l:** (55% yield, d.r. >20:1, [15:1 petroleum ether/EtOAc], brown oil):

**$^1\text{H}$  NMR** (500 MHz, Chloroform-*d*)  $\delta$  = 9.31 (s, 1H), 7.31 (d,  $J$  = 7.3 Hz, 1H), 7.28 (d,  $J$  = 7.4 Hz, 1H), 7.25 (s, 4H), 7.14 – 7.07 (m, 1H), 7.02 – 6.95 (m, 1H), 6.87 (q,  $J$  = 7.1 Hz, 2H), 6.60 (d,  $J$  = 7.8 Hz, 1H), 6.06 (d,  $J$  = 2.2 Hz, 1H), 4.78 (s, 1H), 4.36 (d,  $J$  = 2.0 Hz, 1H), 4.02 (ddd,  $J$  = 8.5, 6.7, 4.7 Hz, 1H), 3.93 – 3.78 (m, 1H), 2.68 (q,  $J$  = 7.6 Hz, 2H), 2.07 – 1.95 (m, 1H), 1.87 – 1.76 (m, 1H), 1.27 ppm (t,  $J$  = 7.6 Hz, 3H);  **$^{13}\text{C}$  NMR** (126 MHz,  $\text{CDCl}_3$ )  $\delta$  = 154.9, 148.5, 143.3, 141.0, 137.6, 135.6, 135.0, 131.5, 130.4, 128.6, 128.5, 128.2, 123.7, 120.2, 119.9, 119.9, 117.8, 116.3, 110.2,

69.2, 67.7, 58.7, 37.4, 30.8, 28.5, 15.5 ppm; **ATR-FTIR** ( $\text{cm}^{-1}$ ):  $\bar{\nu}$  = 3232, 1732, 1609, 1254, 1032, 738  $\text{cm}^{-1}$ ; **HRMS** (ESI):  $m/z$  calcd for  $\text{C}_{27}\text{H}_{26}\text{NO}_2$ : 396.1964; found: 396.1969 [ $M + \text{H}$ ] $^+$ .

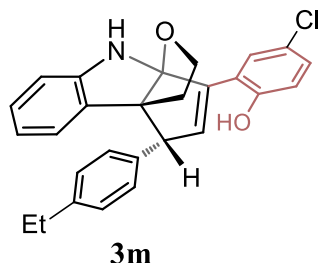

**Compound 3m:** (57% yield, d.r. >20:1, [15:1 petroleum ether/EtOAc], brown oil):

$^1\text{H NMR}$  (500 MHz, Chloroform-*d*)  $\delta$  = 9.41 (s, 1H), 7.33 (d,  $J$  = 7.4 Hz, 1H), 7.27 (s, 6H), 7.24 (d,  $J$  = 2.2 Hz, 2H), 7.22 (d,  $J$  = 2.6 Hz, 1H), 7.19 – 7.11 (m, 1H), 6.99 – 6.83 (m, 1H), 6.64 (d,  $J$  = 7.8 Hz, 1H), 6.10 (d,  $J$  = 2.3 Hz, 1H), 4.74 (d,  $J$  = 18.0 Hz, 1H), 4.37 (d,  $J$  = 2.3 Hz, 1H), 4.04 (ddd,  $J$  = 8.6, 6.7, 4.4 Hz, 1H), 3.88 (td,  $J$  = 8.6, 5.8 Hz, 1H), 2.71 (q,  $J$  = 7.6 Hz, 2H), 2.02 (ddd,  $J$  = 12.7, 8.4, 6.8 Hz, 1H), 1.90 – 1.77 (m, 1H), 1.29 ppm (t,  $J$  = 7.6 Hz, 3H);  $^{13}\text{C NMR}$  (126 MHz,  $\text{CDCl}_3$ )  $\delta$  = 153.6, 148.4, 143.4, 140.0, 137.2, 136.7, 134.7, 130.7, 130.0, 128.6, 128.5, 128.2, 124.5, 123.7, 121.4, 120.4, 119.2, 116.2, 110.3, 69.5, 67.8, 58.6, 37.4, 28.5, 15.5 ppm; **ATR-FTIR** ( $\text{cm}^{-1}$ ):  $\bar{\nu}$  = 3133, 2927, 1608, 1465, 1030, 742  $\text{cm}^{-1}$ ; **HRMS** (ESI):  $m/z$  calcd for  $\text{C}_{27}\text{H}_{25}\text{ClNO}_2$ : 430.1574; found: 430.1580 [ $M + \text{H}$ ] $^+$ .

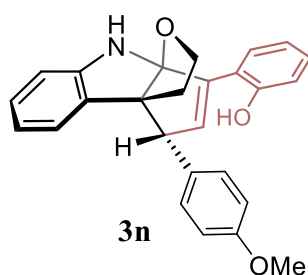

**Compound 3n:** (30% yield, d.r. >20:1, [15:1 petroleum ether/EtOAc], brown oil):

$^1\text{H NMR}$  (500 MHz, Chloroform-*d*)  $\delta$  = 9.33 (s, 1H), 7.36 – 7.25 (m, 3H), 7.24 (d,  $J$  = 4.1 Hz, 2H), 7.17 – 7.05 (m, 1H), 7.05 – 6.93 (m, 1H), 6.97 (m, 2H), 6.89 (ddd,  $J$  = 7.4, 6.1, 1.2 Hz, 2H), 6.61 (d,  $J$  = 7.8 Hz, 1H), 6.05 (d,  $J$  = 2.4 Hz, 1H), 4.79 (s, 1H), 4.34 (d,  $J$  = 2.4 Hz, 1H), 4.02 (ddd,  $J$  = 8.5, 6.6, 4.5 Hz, 1H), 3.88 (td,  $J$  = 8.5, 5.8 Hz, 1H), 3.84 (s, 3H), 2.00 (ddd,  $J$  = 12.6, 8.3, 6.7 Hz, 1H), 1.81 ppm (ddd,  $J$  = 12.6, 5.8, 4.6

Hz, 1H);  $^{13}\text{C}$  NMR (126 MHz,  $\text{CDCl}_3$ )  $\delta$  = 148.5, 140.9, 135.7, 135.0, 132.4, 131.5, 130.4, 129.6, 128.5, 123.7, 120.2, 119.9, 119.9, 117.8, 116.3, 114.1, 110.2, 69.3, 67.7, 58.4, 55.3, 37.4, 30.9 ppm; **ATR-FTIR** ( $\text{cm}^{-1}$ ):  $\bar{\nu}$  = 3262, 1607, 1488, 1207, 1033, 748  $\text{cm}^{-1}$ ; **HRMS** (ESI):  $m/z$  calcd for  $\text{C}_{26}\text{H}_{24}\text{NO}_3$ : 398.1756; found: 398.1762 [ $M + \text{H}$ ] $^+$ .

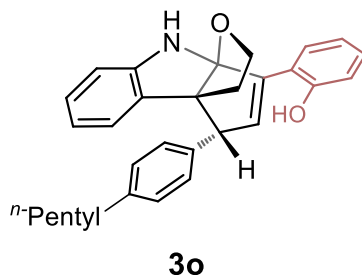

**Compound 3o:** (53% yield, d.r. = 8:1, [10:1 petroleum ether/EtOAc], pink oil):

$^1\text{H}$  NMR (500 MHz, Chloroform-*d*)  $\delta$  = 9.31 (s, 1H), 7.31 (d,  $J$  = 7.4 Hz, 1H), 7.29 – 7.26 (m, 4H), 7.22 (d,  $J$  = 6.2 Hz, 1H), 7.11 (d,  $J$  = 7.6 Hz, 1H), 6.99 (d,  $J$  = 8.2 Hz, 2H), 6.87 (q,  $J$  = 7.5 Hz, 1H), 6.60 (d,  $J$  = 7.8 Hz, 1H), 6.06 (d,  $J$  = 2.3 Hz, 1H), 4.78 (s, 1H), 4.35 (d,  $J$  = 2.1 Hz, 1H), 4.07 – 3.94 (m, 1H), 3.87 (td,  $J$  = 8.4, 5.9 Hz, 1H), 2.71 – 2.54 (m, 2H), 2.16 (s, 3H), 2.05 – 1.94 (m, 1H), 1.86 – 1.75 (m, 1H), 1.70 – 1.60 (m, 2H), 1.40 – 1.31 (m, 2H), 0.90 ppm (q,  $J$  = 5.9, 5.0 Hz, 3H);  $^{13}\text{C}$  NMR (126 MHz,  $\text{CDCl}_3$ )  $\delta$  = 154.9, 148.5, 142.0, 141.0, 137.5, 135.6, 135.0, 131.5, 130.4, 128.7, 128.5, 128.3, 123.7, 120.2, 119.9, 119.9, 117.8, 116.3, 110.2, 69.2, 67.7, 58.7, 37.4, 35.6, 31.5, 31.1, 30.9, 22.5, 14.0; **ATR-FTIR** ( $\text{cm}^{-1}$ ):  $\bar{\nu}$  = 3246, 1608, 1482, 1032, 909, 733  $\text{cm}^{-1}$ ; **HRMS** (ESI):  $m/z$  calcd for  $\text{C}_{30}\text{H}_{32}\text{NO}_2$ : 438.2433; found: 438.2441 [ $M + \text{H}$ ] $^+$ .

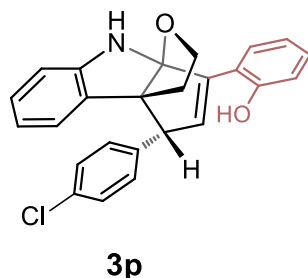

**Compound 3p:** (65% yield, d.r. > 20:1, [15:1 petroleum ether/EtOAc], white crystal, mp. = 98.6°C):

**<sup>1</sup>H NMR** (500 MHz, Chloroform-*d*)  $\delta$  = 9.21 (s, 1H), 7.38 (d, *J* = 8.3 Hz, 2H), 7.31 – 7.25 (m, 7H), 7.23 – 7.21 (m, 1H), 7.15 – 7.08 (m, 1H), 6.98 (d, *J* = 8.1 Hz, 1H), 6.94 – 6.76 (m, 3H), 6.59 (d, *J* = 7.8 Hz, 1H), 6.01 (d, *J* = 2.2 Hz, 1H), 4.78 (s, 1H), 4.34 (d, *J* = 2.1 Hz, 1H), 4.03 (ddd, *J* = 8.7, 6.8, 4.1 Hz, 2H), 3.86 (td, *J* = 8.7, 5.8 Hz, 1H), 1.94 (ddd, *J* = 12.7, 8.7, 6.9 Hz, 2H), 1.85 – 1.72 ppm (m, 2H); **<sup>13</sup>C NMR** (126 MHz, CDCl<sub>3</sub>)  $\delta$  = 154.9, 148.6, 141.4, 137.9, 135.2, 134.8, 133.4, 132.6, 131.5, 130.5, 128.6, 127.8, 127.0, 126.4, 126.0, 123.8, 120.3, 120.0, 117.9, 116.4, 110.2, 69.3, 67.7, 59.1, 37.5 ppm; **ATR-FTIR** (cm<sup>-1</sup>):  $\bar{\nu}$  = 3233, 2922, 1608, 1482, 1032, 729 cm<sup>-1</sup>; **HRMS** (ESI): *m/z* calcd for C<sub>25</sub>H<sub>21</sub>ClNO<sub>2</sub>: 402.1261; found: 402.1267 [*M* + H]<sup>+</sup>.

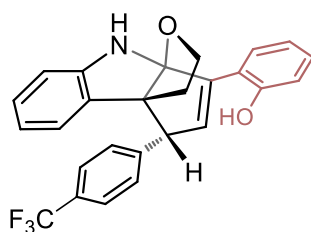

**3q**

**Compound 3q:** (60% yield, d.r. = 10:1, [15:1 petroleum ether/EtOAc], white crystal, mp. = 67.6 °C)

**<sup>1</sup>H NMR** (500 MHz, Chloroform-*d*)  $\delta$  = 9.18 (s, 1H), 7.67 (d, *J* = 8.0 Hz, 2H), 7.47 (d, *J* = 8.1 Hz, 2H), 7.32 – 7.25 (m, 2H), 7.13 (td, *J* = 7.7, 1.3 Hz, 1H), 6.99 (dd, *J* = 8.3, 1.2 Hz, 1H), 6.88 (qd, *J* = 7.2, 1.1 Hz, 2H), 6.60 (d, *J* = 7.8 Hz, 1H), 6.04 (d, *J* = 2.4 Hz, 1H), 4.81 (s, 1H), 4.42 (d, *J* = 2.3 Hz, 1H), 4.05 (ddd, *J* = 8.7, 6.7, 3.8 Hz, 1H), 3.86 (td, *J* = 8.9, 5.7 Hz, 1H), 1.91 (ddd, *J* = 12.6, 9.0, 6.8 Hz, 1H), 1.82 ppm (ddd, *J* = 12.6, 5.7, 3.8 Hz, 1H); **<sup>13</sup>C NMR** (126 MHz, CDCl<sub>3</sub>)  $\delta$  = 154.9, 148.7, 144.6, 142.2, 134.1, 131.5, 130.7, 129.0, 128.9, 125.8, 125.7, 125.7, 125.7, 123.6, 120.3, 120.1, 119.6, 118.0, 116.3, 110.2, 69.4, 67.7, 58.6, 37.5 ppm; **<sup>13</sup>C NMR** (470 MHz, CDCl<sub>3</sub>)  $\delta$  = - 62.4 ppm; **ATR-FTIR** (cm<sup>-1</sup>):  $\bar{\nu}$  = 3154, 2877, 1610, 1451, 1324, 728cm<sup>-1</sup>; **HRMS** (ESI): *m/z* calcd for C<sub>26</sub>H<sub>21</sub>F<sub>3</sub>NO<sub>2</sub>: 436.1524; found: 436.1528 [*M* + H]<sup>+</sup>.

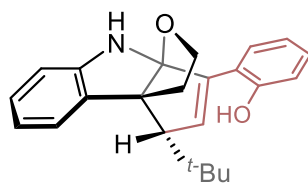

**3r**

**Compound 3r:** (30% yield, d.r. > 20:1, [15:1 petroleum ether/EtOAc], brown oil):

$^1\text{H NMR}$  (500 MHz, Chloroform-*d*)  $\delta$  = 9.22 (s, 1H), 7.25 – 7.19 (m, 1H), 7.14 (ddd,  $J$  = 16.0, 7.6, 1.6 Hz, 2H), 7.09 – 7.03 (m, 1H), 6.94 (dd,  $J$  = 8.2, 1.3 Hz, 1H), 6.81 (q,  $J$  = 7.8 Hz, 2H), 6.55 (d,  $J$  = 7.8 Hz, 1H), 5.92 (d,  $J$  = 2.3 Hz, 1H), 4.68 (s, 1H), 4.14 (ddd,  $J$  = 8.7, 6.5, 4.0 Hz, 1H), 3.94 (td,  $J$  = 8.7, 5.5 Hz, 1H), 2.91 (td,  $J$  = 7.7, 2.3 Hz, 1H), 2.53 (ddd,  $J$  = 12.4, 8.8, 6.6 Hz, 1H), 2.17 (ddd,  $J$  = 12.4, 5.4, 4.0 Hz, 1H), 1.82 – 1.66 (m, 1H), 1.63 – 1.48 (m, 3H), 1.43 (q,  $J$  = 7.3 Hz, 2H), 0.97 ppm (t,  $J$  = 7.2 Hz, 3H);  $^{13}\text{C NMR}$  (126 MHz,  $\text{CDCl}_3$ )  $\delta$  = 154.8, 148.7, 138.6, 137.7, 135.1, 131.4, 130.1, 128.3, 123.6, 120.2, 120.0, 119.7, 117.6, 116.7, 110.0, 69.0, 66.2, 53.5, 35.8, 31.5, 31.0, 22.9, 14.0 ppm; **ATR-FTIR** ( $\text{cm}^{-1}$ ):  $\bar{\nu}$  = 3142, 2789, 1452, 897, 725, 654 $\text{cm}^{-1}$ ; **HRMS** (ESI):  $m/z$  calcd for  $\text{C}_{23}\text{H}_{26}\text{NO}_2$ : 348.1964; found: 348.1921 [ $M + \text{H}$ ] $^+$ .

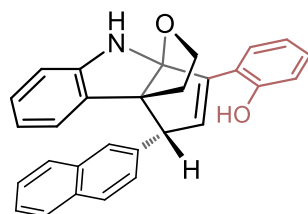

**3s**

**Compound 3s:** (40% yield, d.r. > 20:1, [15:1 petroleum ether/EtOAc], brown oil):

$^1\text{H NMR}$  (500 MHz, Chloroform-*d*)  $\delta$  = 9.35 (s, 1H), 7.99 – 7.80 (m, 3H), 7.74 (s, 1H), 7.52 (t,  $J$  = 6.3 Hz, 3H), 7.41 (d,  $J$  = 7.4 Hz, 1H), 7.35 – 7.28 (m, 2H), 7.14 (d,  $J$  = 7.8 Hz, 1H), 7.03 (d,  $J$  = 8.7 Hz, 1H), 6.92 (dd,  $J$  = 13.7, 7.2 Hz, 1H), 6.63 (d,  $J$  = 7.8 Hz, 1H), 6.19 (d,  $J$  = 2.2 Hz, 1H), 4.83 (s, 1H), 4.55 (d,  $J$  = 2.0 Hz, 1H), 4.18 – 3.95 (m, 1H), 3.95 – 3.79 (m, 1H), 2.08 – 1.93 (m, 2H), 1.81 ppm (dt,  $J$  = 12.6, 5.1 Hz, 1H);  $^{13}\text{C NMR}$  (126 MHz,  $\text{CDCl}_3$ )  $\delta$  = 154.8, 148.6, 141.7, 138.9, 134.6, 134.4, 133.2, 131.4, 130.6, 129.9, 128.9, 128.7, 123.6, 120.2, 120.0, 119.7, 117.9, 116.2, 110.2,

69.3, 67.6, 58.3, 37.4 ppm; **ATR-FTIR** ( $\text{cm}^{-1}$ ):  $\bar{\nu}$  = 3137, 2879, 1609, 1452, 897, 725  $\text{cm}^{-1}$ ; **HRMS** (ESI):  $m/z$  calcd for  $\text{C}_{29}\text{H}_{24}\text{NO}_2$ : 418.1807; found: 418.1823 [ $M + \text{H}$ ] $^+$ .

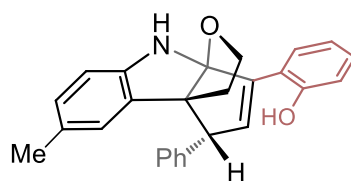

**3t**

**Compound 3t:** (49% yield, d.r. = 5:1, [15:1 petroleum ether/EtOAc], brown oil):

**$^1\text{H}$  NMR** (500 MHz, Chloroform- $d$ )  $\delta$  = 7.42 (t,  $J$  = 7.5 Hz, 2H), 7.34 (dd,  $J$  = 7.7, 6.1 Hz, 3H), 7.30 – 7.21 (m, 3H), 7.13 (s, 1H), 7.03 – 6.96 (m, 1H), 6.93 (dd,  $J$  = 7.9, 1.8 Hz, 1H), 6.86 (td,  $J$  = 7.4, 1.2 Hz, 1H), 6.52 (d,  $J$  = 7.9 Hz, 1H), 6.05 (d,  $J$  = 2.4 Hz, 1H), 4.38 (d,  $J$  = 2.3 Hz, 1H), 4.07 – 3.94 (m, 1H), 3.87 (td,  $J$  = 8.4, 5.9 Hz, 1H), 2.35 (s, 3H), 2.00 – 1.91 (m, 1H), 1.79 ppm (ddd,  $J$  = 12.6, 5.9, 4.7 Hz, 1H);  **$^{13}\text{C}$  NMR** (126 MHz,  $\text{CDCl}_3$ )  $\delta$  = 154.9, 146.2, 141.3, 140.6, 135.4, 135.3, 131.5, 130.5, 129.9, 129.1, 128.8, 128.7, 128.0, 127.3, 124.3, 119.9, 117.9, 116.8, 110.5, 69.2, 67.7, 59.0, 37.4 21.0 ppm; **ATR-FTIR** ( $\text{cm}^{-1}$ ):  $\bar{\nu}$  = 3232, 2871, 1484, 1252, 1031, 702  $\text{cm}^{-1}$ ; **HRMS** (ESI):  $m/z$  calcd for  $\text{C}_{26}\text{H}_{24}\text{NO}_2$ : 382.1807; found: 382.1816 [ $M + \text{H}$ ] $^+$ .

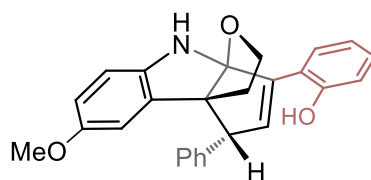

**3u**

**Compound 3u:** (36% yield, d.r. > 20:1, [15:1 petroleum ether/EtOAc], brown oil):

**$^1\text{H}$  NMR** (500 MHz, Chloroform- $d$ )  $\delta$  = 7.41 (dd,  $J$  = 8.3, 6.8 Hz, 2H), 7.34 (d,  $J$  = 7.4 Hz, 3H), 7.30 – 7.23 (m, 2H), 6.99 (dd,  $J$  = 8.2, 1.3 Hz, 1H), 6.92 (d,  $J$  = 2.6 Hz, 1H), 6.87 (d,  $J$  = 1.3 Hz, 1H), 6.71 (dd,  $J$  = 8.5, 2.6 Hz, 1H), 6.57 (d,  $J$  = 8.5 Hz, 1H), 6.06 (d,  $J$  = 2.3 Hz, 1H), 4.38 (d,  $J$  = 2.4 Hz, 1H), 4.00 (ddd,  $J$  = 8.7, 6.7, 4.9 Hz, 1H), 3.88 (td,  $J$  = 8.3, 5.9 Hz, 1H), 3.82 (s, 3H), 1.95 (ddd,  $J$  = 12.7, 8.0, 6.6 Hz, 1H), 1.84 – 1.75 ppm (m, 1H);  **$^{13}\text{C}$  NMR** (126 MHz,  $\text{CDCl}_3$ )  $\delta$  = 154.9, 154.8, 142.3, 141.4, 140.4, 136.7, 135.2, 131.5, 130.5, 128.8, 128.6, 127.4, 119.9, 119.9, 117.9, 117.2,



113.2, 111.4, 110.7, 69.2, 68.0, 58.9, 56.1, 37.3 ppm; **ATR-FTIR** ( $\text{cm}^{-1}$ ):  $\bar{\nu} = 3238$ , 2932, 1485, 1162, 1031, 729 $\text{cm}^{-1}$ ; **HRMS** (ESI):  $m/z$  calcd for  $\text{C}_{26}\text{H}_{24}\text{NO}_3$ : 398.1756; found: 398.1761 [ $M + \text{H}$ ] $^+$ .

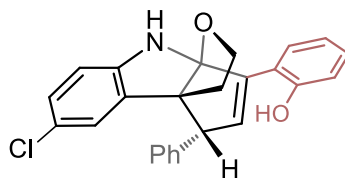

**3v**

**Compound 3v:** (47% yield, d.r. > 20:1, [15:1 petroleum ether/EtOAc], brown oil):

$^1\text{H NMR}$  (500 MHz, Chloroform- $d$ )  $\delta = 9.14$  (s, 1H), 7.42 (t,  $J = 7.5$  Hz, 2H), 7.36 – 7.30 (m, 3H), 7.30 – 7.23 (m, 3H), 7.07 (dd,  $J = 8.4, 2.2$  Hz, 1H), 6.99 (dd,  $J = 8.2, 1.2$  Hz, 1H), 6.87 (td,  $J = 7.5, 1.3$  Hz, 1H), 6.50 (d,  $J = 8.4$  Hz, 1H), 6.07 (d,  $J = 2.3$  Hz, 1H), 4.81 (s, 1H), 4.35 (d,  $J = 2.4$  Hz, 1H), 4.02 (ddd,  $J = 8.7, 6.7, 4.4$  Hz, 1H), 3.86 (td,  $J = 8.6, 5.8$  Hz, 1H), 1.96 (ddd,  $J = 12.7, 8.5, 6.7$  Hz, 1H), 1.77 ppm (ddd,  $J = 12.8, 5.8, 4.4$  Hz, 1H);  $^{13}\text{C NMR}$  (126 MHz,  $\text{CDCl}_3$ )  $\delta = 154.8, 147.1, 141.1, 140.0, 136.5, 135.3, 131.5, 130.6, 128.9, 128.6, 128.5, 127.5, 124.6, 124.0, 120.1, 119.6, 118.0, 116.7, 111.0, 69.4, 67.7, 58.8, 37.4$  ppm; **ATR-FTIR** ( $\text{cm}^{-1}$ ):  $\bar{\nu} = 3263, 2920, 1603, 1480, 1250, 698\text{cm}^{-1}$ ; **HRMS** (ESI):  $m/z$  calcd for  $\text{C}_{25}\text{H}_{21}\text{ClNO}_2$ : 402.1261; found: 402.1266 [ $M + \text{H}$ ] $^+$ .

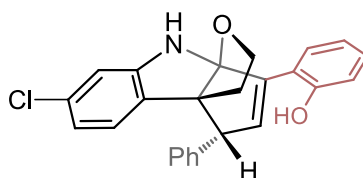

**3w**

**Compound 3w:** (55% yield, d.r. > 20:1, [15:1 petroleum ether/EtOAc], brown oil):

$^1\text{H NMR}$  (500 MHz, Chloroform- $d$ )  $\delta = 9.13$  (s, 1H), 7.42 (t,  $J = 7.4$  Hz, 2H), 7.37 – 7.30 (m, 3H), 7.30 – 7.26 (m, 1H), 7.21 (d,  $J = 7.9$  Hz, 1H), 7.00 (d,  $J = 8.1$  Hz, 1H), 6.89 (t,  $J = 7.4$  Hz, 1H), 6.84 (dd,  $J = 7.9, 1.6$  Hz, 1H), 6.56 (d,  $J = 1.6$  Hz, 1H), 6.08 (d,  $J = 2.2$  Hz, 1H), 4.90 (s, 1H), 4.35 (d,  $J = 2.1$  Hz, 1H), 4.06 (ddd,  $J = 8.7, 6.8, 4.0$  Hz, 1H), 3.87 (td,  $J = 8.8, 5.7$  Hz, 1H), 1.98 (ddd,  $J = 12.7, 8.8, 7.0$  Hz, 2H), 1.85 – 1.70 ppm (m, 1H);  $^{13}\text{C NMR}$  (126 MHz,  $\text{CDCl}_3$ )  $\delta = 154.76, 149.73, 141.19, 140.10, 135.43, 134.28, 133.22, 131.49, 130.60, 128.84, 128.61, 127.45, 124.47, 120.10,$

119.86, 119.70, 117.94, 116.66, 109.98, 69.54, 67.13, 58.95, 37.41 ppm; **ATR-FTIR** ( $\text{cm}^{-1}$ ):  $\bar{\nu} = 3146, 1607, 1438, 1032, 906, 708 \text{ cm}^{-1}$ ; **HRMS** (ESI):  $m/z$  calcd for  $\text{C}_{25}\text{H}_{21}\text{ClNO}_2$ : 402.1261; found: 402.1266 [ $M + \text{H}$ ] $^+$ .

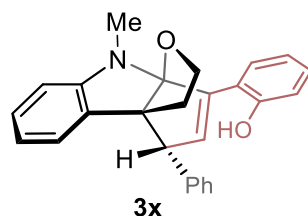

**Compound 3x:** (36% yield, d.r. = 2:1, [15:1 petroleum ether/EtOAc], white crystal, mp. = 92.1 °C):

$^1\text{H NMR}$  (500 MHz, Chloroform-*d*)  $\delta = 9.44$  (s, 1H), 7.44 – 7.36 (m, 2H), 7.36 – 7.30 (m, 3H), 7.29 – 7.25 (m, 1H), 7.21 – 7.14 (m, 2H), 7.01 – 6.94 (m, 2H), 6.89 – 6.82 (m, 1H), 6.78 (t,  $J = 7.3$  Hz, 1H), 6.39 (d,  $J = 7.8$  Hz, 1H), 5.98 (d,  $J = 2.0$  Hz, 1H), 4.33 (d,  $J = 1.9$  Hz, 1H), 4.17 – 4.04 (m, 1H), 3.66 (ddd,  $J = 10.7, 8.7, 5.0$  Hz, 1H), 2.70 (s, 3H), 2.06 (ddd,  $J = 12.4, 10.8, 7.1$  Hz, 1H), 1.75 ppm (ddd,  $J = 12.5, 4.9, 2.0$  Hz, 1H);  $^{13}\text{C NMR}$  (126 MHz,  $\text{CDCl}_3$ )  $\delta = 154.5, 151.3, 142.1, 140.1, 137.1, 133.0, 131.2, 130.1, 128.8, 128.6, 128.5, 127.2, 123.1, 122.3, 119.9, 118.4, 118.1, 117.2, 105.8, 70.1, 67.3, 57.6, 37.5, 29.1$  ppm; **ATR-FTIR** ( $\text{cm}^{-1}$ ):  $\bar{\nu} = 3138, 2912, 1479, 1255, 985, 711 \text{ cm}^{-1}$ ; **HRMS** (ESI):  $m/z$  calcd for  $\text{C}_{26}\text{H}_{24}\text{NO}_2$ : 382.1807; found: 382.1816 [ $M + \text{H}$ ] $^+$ .

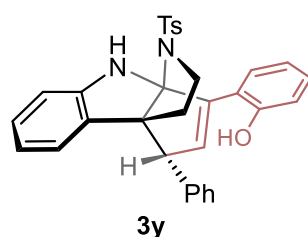

**Compound 3y:** (35% yield, d.r. = 2:1, [15:1 petroleum ether/EtOAc], brown oil):

$^1\text{H NMR}$  (500 MHz, Chloroform-*d*)  $\delta = 8.04$  (d,  $J = 44.8$  Hz, 1H), 7.55 – 7.47 (m, 5H), 7.42 – 7.29 (m, 6H), 7.14 (ddq,  $J = 24.8, 16.7, 8.4, 7.9$  Hz, 7H), 6.93 (d,  $J = 8.1$  Hz, 1H), 6.88 – 6.79 (m, 2H), 5.97 (d,  $J = 2.6$  Hz, 1H), 4.33 (t,  $J = 6.1$  Hz, 1H), 4.05 (s, 1H), 3.19 (q,  $J = 6.8$  Hz, 2H), 2.93 (t,  $J = 7.1$  Hz, 1H), 2.36 ppm (s, 3H);  $^{13}\text{C NMR}$  (126 MHz,  $\text{CDCl}_3$ )  $\delta = 155.4, 154.3, 153.6, 143.2, 143.1, 140.0, 137.2, 136.8, 136.3, 135.5, 131.5, 130.2, 129.6, 129.5, 128.8, 128.7, 128.7, 128.6, 128.4, 127.9, 127.8,$

127.6, 127.0, 126.9, 126.9, 126.8, 126.2, 125.4, 124.5, 123.3, 122.7, 122.6, 121.8, 121.5, 120.0, 119.6, 118.8, 116.8, 111.4, 111.2, 111.0, 110.7, 109.0, 43.3, 43.1, 33.3, 25.4, 25.2, 21.5 ppm; **ATR-FTIR**( $\text{cm}^{-1}$ ) :  $\bar{\nu}$  = 3138, 2912, 1479, 1255, 985, 711  $\text{cm}^{-1}$ ; **HRMS** (ESI):  $m/z$  calcd for  $\text{C}_{32}\text{H}_{29}\text{N}_2\text{SO}_3$ : 521.1899; found: 521.1826 [ $M + \text{H}$ ] $^+$ .

### 3. General Procedure for the Synthesis derivatives.

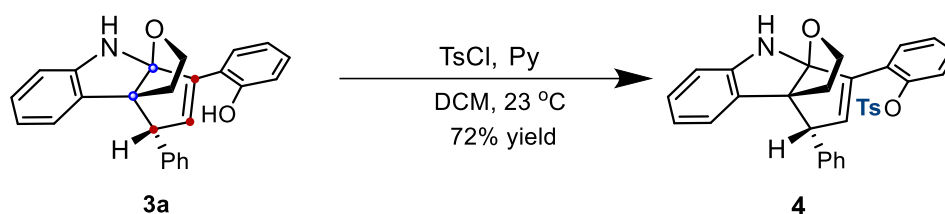

To a mixture of **3a** (36.7 mg, 0.10 mmol) and pyridine (1.0 mL), *p*-toluenesulfonyl chloride (27.4 mg, 0.12 mmol) in dry dichloromethane (10 mL) was added slowly and stirred at room temperature for 1 h. The reaction mixture was then washed with aqueous 1N HCl (10.0 mL) and extracted with diethyl ether (2 × 10 mL). The combined organic phases were washed with water (10.0 mL), brine solution (10 mL) and dried over anhydrous sodium sulfate. The filtered solution was concentrated and was purified by column chromatography [5% ethyl acetate in petroleum ether] to yield **4** (37.5 mg, 72%) as white crystals, mp. = 150-152 °C:  **$^1\text{H}$  NMR** (500 MHz, Chloroform-*d*)  $\delta$  = 8.00 – 7.88 (m, 1H), 7.50 – 7.36 (m, 2H), 7.36 – 7.20 (m, 7H), 7.18 – 7.12 (m, 2H), 7.07 (td,  $J$  = 7.6, 1.3 Hz, 1H), 6.91 (d,  $J$  = 8.2 Hz, 2H), 6.83 (td,  $J$  = 7.4, 1.0 Hz, 1H), 6.64 – 6.50 (m, 1H), 6.05 (d,  $J$  = 2.4 Hz, 1H), 4.80 (s, 1H), 3.85 (d,  $J$  = 2.5 Hz, 1H), 3.81 (ddd,  $J$  = 8.6, 6.8, 3.7 Hz, 1H), 3.67 (td,  $J$  = 8.9, 5.5 Hz, 1H), 2.21 (s, 3H), 1.74 (ddd,  $J$  = 12.4, 9.1, 6.8 Hz, 1H), 1.61 ppm (ddd,  $J$  = 12.4, 5.5, 3.6 Hz, 1H);  **$^{13}\text{C}$  NMR** (126 MHz,  $\text{CDCl}_3$ )  $\delta$  = 149.6, 148.0, 145.1, 140.6, 137.5, 137.1, 135.4, 133.4, 130.3, 129.5, 129.0, 128.6, 128.6, 128.4, 128.2, 127.6, 127.3, 127.1, 123.7, 123.3, 119.9, 117.5, 110.4, 68.7, 67.5, 59.0, 37.3, 21.6 ppm, **HRMS** (ESI):  $m/z$  calcd for  $\text{C}_{32}\text{H}_{28}\text{NO}_4\text{S}$ : 522.1739; found: 522.1746 [ $M + \text{H}$ ] $^+$ .

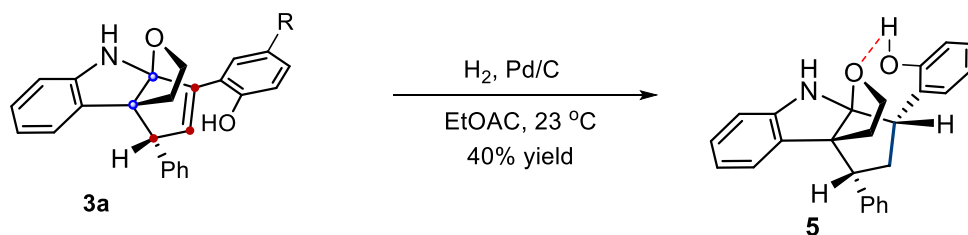

A solution of Pd/C (7.3 mg, 20%) in EtOAc (2.0 mL) was added **3a** (36.7 mg, 0.10 mmol) to a 15 mL Schlenk tube under  $\text{H}_2$ . After stirring for 12 hours at room temperature in a round bottom flask, the system was concentrated in vacuo and the chromatogram of the Flash residue (hexane/ether = 3:1 to 2:1) yield **5** (14.4 mg, 40%) as white crystals, mp. = 163.9 °C:  $^1\text{H NMR}$  (500 MHz, Chloroform-*d*)  $\delta$  = 8.22 (s, 1H), 7.33 – 7.26 (m, 4H), 7.16 – 7.07 (m, 3H), 7.05 (d,  $J$  = 8.1 Hz, 1H), 6.94 (t,  $J$  = 7.6 Hz, 2H), 6.44 (d,  $J$  = 7.8 Hz, 1H), 6.37 (t,  $J$  = 7.5 Hz, 1H), 5.75 (d,  $J$  = 7.5 Hz, 1H), 4.47 – 4.33 (m, 1H), 4.22 (s, 1H), 4.14 – 4.01 (m, 1H), 3.77 (dd,  $J$  = 12.9, 4.8 Hz, 1H), 3.69 (dd,  $J$  = 13.0, 4.7 Hz, 1H), 2.69 – 2.52 (m, 2H), 2.33 – 2.15 ppm (m, 2H);  $^{13}\text{C NMR}$  (126 MHz,  $\text{CDCl}_3$ )  $\delta$  = 155.9, 149.9, 138.9, 129.4, 128.8, 128.4, 128.1, 128.1, 128.0, 127.1, 126.4, 123.2, 120.2, 118.5, 117.4, 112.7, 108.2, 70.2, 67.8, 54.8, 48.5, 42.0, 35.1 ppm; ATR-FTIR ( $\text{cm}^{-1}$ ):  $\bar{\nu}$  = 3303, 1919, 1606, 1463, 1233, 745  $\text{cm}^{-1}$ ; HRMS (ESI):  $m/z$  calcd for  $\text{C}_{25}\text{H}_{24}\text{NO}_2$ : 370.1807; found: 370.1816[ $M + \text{H}$ ] $^+$ .

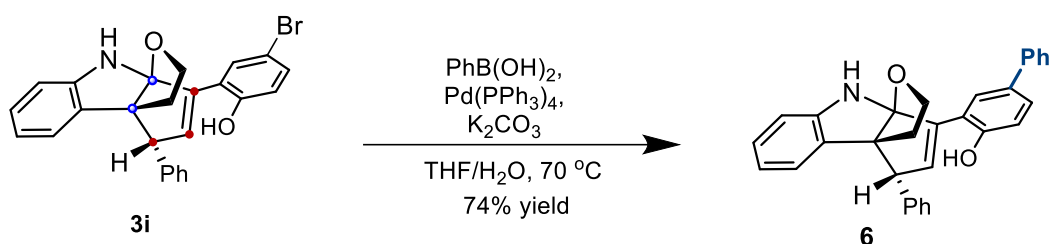

Under nitrogen atmosphere, compound **3i** (22.0 mg, 0.05 mmol), phenylboronic acid (12.0 mg, 2.0 equiv.),  $\text{K}_2\text{CO}_3$  (20.3 mg, 3.0 equiv.),  $\text{Pd(PPh}_3)_4$  (5.6 mg, 0.1 equiv.), were successively added to a 25 mL Schlenk tube, followed by the addition of 2.0 mL of THF and 0.2 mL  $\text{H}_2\text{O}$ , the mixture was degassed and purged with  $\text{N}_2$  and then heated to 70 °C for 24 h. After cooling to rt, the solvent was removed and purified by chromatography to yield a yellow foam **6** (16.2 mg, 0.04 mmol).  $^1\text{H NMR}$  (500 MHz, Chloroform-*d*)  $\delta$  = 9.40 (s, 1H), 7.53 (td,  $J$  = 8.7, 2.0 Hz, 2H), 7.48 (d,  $J$  = 2.4 Hz, 1H), 7.41 (dt,  $J$  = 7.5, 5.9 Hz, 3H), 7.38 – 7.17 (m, 6H), 7.13 (tt,  $J$  = 7.7, 1.8 Hz, 1H), 7.07

(d,  $J = 8.4$  Hz, 1H), 6.89 (q,  $J = 8.7, 8.0$  Hz, 2H), 6.62 (d,  $J = 7.8$  Hz, 1H), 6.12 (dd,  $J = 28.5, 2.3$  Hz, 1H), 4.83 (s, 1H), 4.39 (dd,  $J = 16.3, 2.4$  Hz, 1H), 4.04 (tdd,  $J = 9.2, 6.7, 4.3$  Hz, 1H), 3.88 (ddd,  $J = 12.9, 8.5, 5.9$  Hz, 1H), 2.12 – 1.91 (m, 1H), 1.89 – 1.76 ppm (m, 1H);  $^{13}\text{C}$  NMR (126 MHz,  $\text{CDCl}_3$ )  $\delta = 153.4, 147.5, 140.3, 139.5, 139.2, 135.4, 134.6, 133.8, 133.5, 132.5, 132.0, 129.0, 128.1, 127.7, 127.6, 127.5, 126.3, 125.6, 122.7, 119.2, 118.6, 117.3, 109.2, 68.3, 66.7, 58.0, 36.4$  ppm; ATR-FTIR ( $\text{cm}^{-1}$ ):  $\bar{\nu} = 3303, 1919, 1606, 1463, 1233, 745$   $\text{cm}^{-1}$ ; HRMS (ESI):  $m/z$  calcd for  $\text{C}_{31}\text{H}_{26}\text{NO}_2$ : 444.1964; found: 444.1926[ $M + \text{H}$ ] $^+$ .

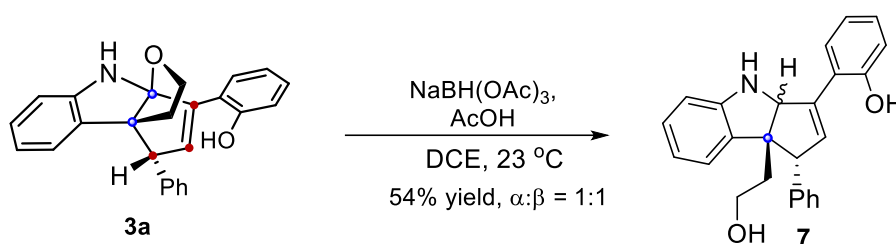

Under room temperature, compound **3a** (36.7 mg, 0.10 mmol) was dissolved in 2.0 mL DCE,  $\text{NaBH(OAc)}_3$  (79.4 mg, 0.37 mmol), AcOH(14.3  $\mu\text{L}$ , 0.25 mmol) were successively added to a 15 mL Schlenk tube. The solution was stirred for 3 hours until the **3a** was disappeared. The reaction was quenched with  $\text{NaHCO}_3$  and extracted with  $\text{CH}_2\text{Cl}_2$ , the combined organic layers were washed with a saturated salt solution, dried with magnesium sulfate, and evaporated. The residue was purified by chromatography to give **7** (24.8 mg, 65%) as a gray solid, mp. = 101.7  $^\circ\text{C}$ :  $^1\text{H}$  NMR (500 MHz, Chloroform- $d$ )  $\delta = 7.34$  (t,  $J = 7.5$  Hz, 2H), 7.28 (t,  $J = 8.1$  Hz, 5H), 7.24 – 7.21 (m, 2H), 7.21 – 7.14 (m, 3H), 7.02 (dt,  $J = 20.1, 7.5$  Hz, 3H), 6.85 (dt,  $J = 12.6, 6.5$  Hz, 5H), 6.50 (t,  $J = 7.5$  Hz, 1H), 6.04 (d,  $J = 2.4$  Hz, 1H), 5.96 (s, 1H), 5.51 (d,  $J = 7.6$  Hz, 1H), 5.16 (d,  $J = 16.9$  Hz, 2H), 4.28 (d,  $J = 14.9$  Hz, 1H), 3.61 (dt,  $J = 9.2, 4.5$  Hz, 1H), 3.42 (dt,  $J = 11.3, 4.2$  Hz, 1H), 3.14 (td,  $J = 10.6, 4.1$  Hz, 1H), 3.02 (td,  $J = 11.0, 3.4$  Hz, 1H), 2.33 (dd,  $J = 9.6, 5.0$  Hz, 1H), 2.29 – 2.20 (m, 1H), 1.53 (ddd,  $J = 15.1, 10.6, 4.8$  Hz, 2H), 1.47 – 1.39 ppm (m, 1H);  $^{13}\text{C}$  NMR (126 MHz,  $\text{CDCl}_3$ )  $\delta = 155.1, 155.0, 147.6, 147.0, 143.2, 142.8, 140.6, 140.4, 138.6, 133.8, 133.7, 133.1, 130.6, 130.3, 129.6, 129.6, 129.4, 129.2, 128.5, 127.9, 127.9, 127.1, 127.1, 126.8, 123.4, 123.2, 122.7, 122.5, 121.5, 119.8, 119.6, 116.9, 116.8, 114.2, 114.0, 74.8, 74.4, 62.1,$

62.1, 61.0, 60.5, 60.5, 59.4, 43.0, 40.0 ppm; **ATR-FTIR** ( $\text{cm}^{-1}$ ):  $\bar{\nu} = 3283, 2922, 1601, 1451, 1259, 729 \text{ cm}^{-1}$ ; **HRMS** (ESI):  $m/z$  calcd for  $\text{C}_{25}\text{H}_{24}\text{NO}_2$ : 370.1807; found: 370.1813 $[M + \text{H}]^+$

#### 4. Relative Configuration Assignment of 4 and 5 by X-Ray Crystallographic Analysis

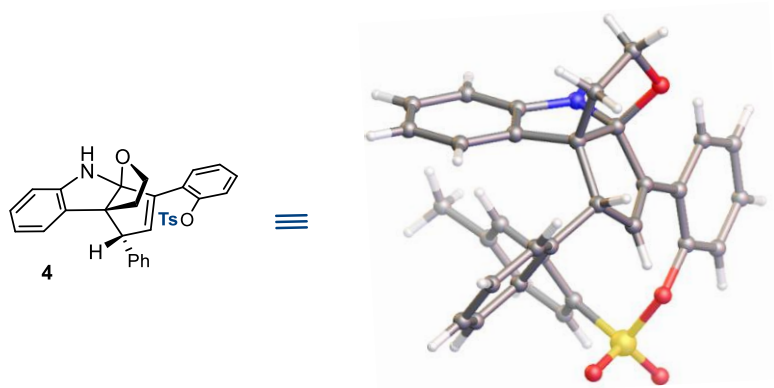

**Table 2 Crystal data and structure refinement for 4.**

|                                  |                                                 |
|----------------------------------|-------------------------------------------------|
| Identification code              | <b>4</b>                                        |
| CCDC                             | 2123850                                         |
| Empirical formula                | $\text{C}_{32}\text{H}_{27}\text{NO}_4\text{S}$ |
| Formula weight                   | 521.60                                          |
| Temperature/K                    | 298(2)                                          |
| Crystal system                   | monoclinic                                      |
| Space group                      | $P2_1/n$                                        |
| $a/\text{\AA}$                   | 11.0968(11)                                     |
| $b/\text{\AA}$                   | 13.8829(15)                                     |
| $c/\text{\AA}$                   | 16.8118(16)                                     |
| $\alpha/^\circ$                  | 90                                              |
| $\beta/^\circ$                   | 101.868(3)                                      |
| $\gamma/^\circ$                  | 90                                              |
| Volume/ $\text{\AA}^3$           | 2534.6(4)                                       |
| Z                                | 4                                               |
| $\rho_{\text{calc}}/\text{cm}^3$ | 1.367                                           |
| $\mu/\text{mm}^{-1}$             | 0.168                                           |
| F(000)                           | 1096.0                                          |
| Crystal size/ $\text{mm}^3$      | $0.3 \times 0.23 \times 0.16$                   |
| Radiation                        | $\text{MoK}\alpha$ ( $\lambda = 0.71073$ )      |

|                                                  |                                                                    |
|--------------------------------------------------|--------------------------------------------------------------------|
| 2 $\theta$ range for data collection/ $^{\circ}$ | 3.838 to 50.038                                                    |
| Index ranges                                     | $-11 \leq h \leq 13$ , $-16 \leq k \leq 16$ , $-17 \leq l \leq 20$ |
| Reflections collected                            | 12496                                                              |
| Independent reflections                          | 4458 [ $R_{\text{int}} = 0.1050$ , $R_{\text{sigma}} = 0.0693$ ]   |
| Data/restraints/parameters                       | 4458/0/344                                                         |
| Goodness-of-fit on $F^2$                         | 0.961                                                              |
| Final R indexes [ $I \geq 2\sigma(I)$ ]          | $R_1 = 0.0673$ , $wR_2 = 0.1670$                                   |
| Final R indexes [all data]                       | $R_1 = 0.0963$ , $wR_2 = 0.1865$                                   |
| Largest diff. peak/hole / $e \text{ \AA}^{-3}$   | 0.28/-0.54                                                         |

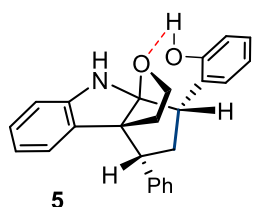

≡

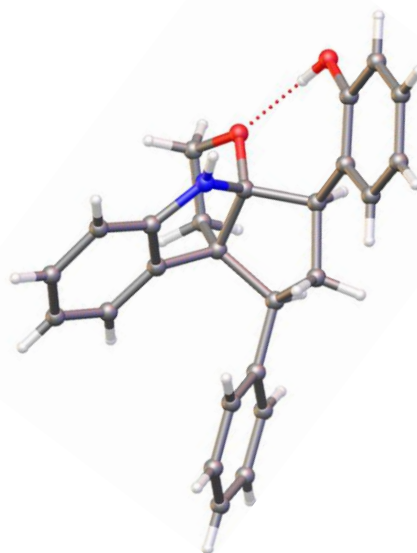

**Table 3 Crystal data and structure refinement for 5.**

|                     |                    |
|---------------------|--------------------|
| Identification code | <b>5</b>           |
| CCDC                | 2123851            |
| Empirical formula   | $C_{25}H_{23}NO_2$ |
| Formula weight      | 369.44             |
| Temperature/K       | 293(2)             |
| Crystal system      | orthorhombic       |
| Space group         | Pbcn               |
| a/ $\text{\AA}$     | 19.8233(16)        |
| b/ $\text{\AA}$     | 10.5498(9)         |
| c/ $\text{\AA}$     | 18.1025(9)         |
| $\alpha/^\circ$     | 90                 |
| $\beta/^\circ$      | 90                 |
| $\gamma/^\circ$     | 90                 |

|                                             |                                                               |
|---------------------------------------------|---------------------------------------------------------------|
| Volume/Å <sup>3</sup>                       | 3785.8(5)                                                     |
| Z                                           | 8                                                             |
| ρ <sub>calc</sub> /cm <sup>3</sup>          | 1.296                                                         |
| μ/mm <sup>-1</sup>                          | 0.643                                                         |
| F(000)                                      | 1568.0                                                        |
| Crystal size/mm <sup>3</sup>                | 0.15 × 0.13 × 0.05                                            |
| Radiation                                   | CuKα (λ = 1.54178)                                            |
| 2θ range for data collection/°              | 8.922 to 132.092                                              |
| Index ranges                                | -23 ≤ h ≤ 11, -11 ≤ k ≤ 12, -21 ≤ l ≤ 17                      |
| Reflections collected                       | 8128                                                          |
| Independent reflections                     | 3313 [R <sub>int</sub> = 0.0475, R <sub>sigma</sub> = 0.0623] |
| Data/restraints/parameters                  | 3313/0/255                                                    |
| Goodness-of-fit on F <sup>2</sup>           | 0.992                                                         |
| Final R indexes [I ≥ 2σ (I)]                | R <sub>1</sub> = 0.0558, wR <sub>2</sub> = 0.1414             |
| Final R indexes [all data]                  | R <sub>1</sub> = 0.1010, wR <sub>2</sub> = 0.1669             |
| Largest diff. peak/hole / e Å <sup>-3</sup> | 0.47/-0.30                                                    |

---

## 5. References

1. Du, J.-Y.; Ma, Y.-H.; Meng, F.-X.; Chen, B.-L.; Zhang, S.-L.; Li, Q.-L.; Gong, S.-W.; Wang, D.-Q.; Ma, C.-L. *Org. Lett.* **2018**, *20*, 4371-4374.
2. Du, J.-Y.; Ma, Y.-H.; Meng, F.-X.; Zhang, R.-R.; Wang, R.-N.; Shi, H.-L.; Wang, Q.; Fan, Y.-X.; Huang, H.-L.; Cui, J.-C.; Ma, C.-L. *Org. Lett.* **2019**, *21*, 465-468.

## 6. Copies of NMR and HPLC Spectra





<sup>1</sup>H NMR (500 MHz, CDCl<sub>3</sub>) of compound **3a'**

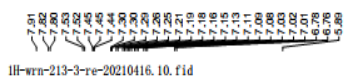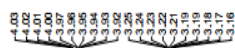

1H-wr-213-3-re-20210416.10.fid

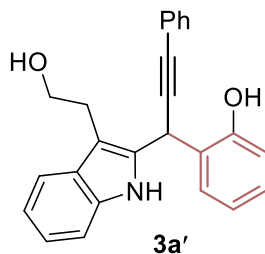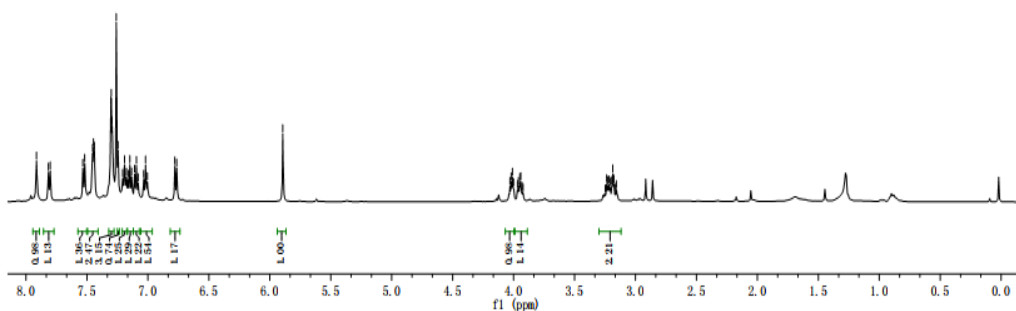

<sup>13</sup>C NMR (500 MHz, CDCl<sub>3</sub>) of compound **3a'**

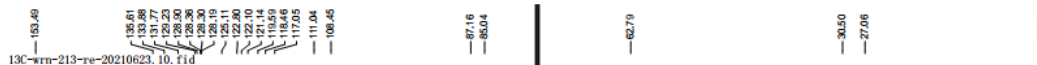

13C-wr-213-re-20210623.10.fid

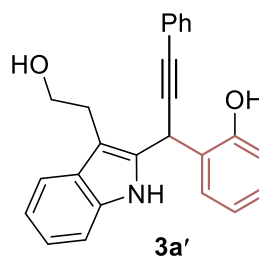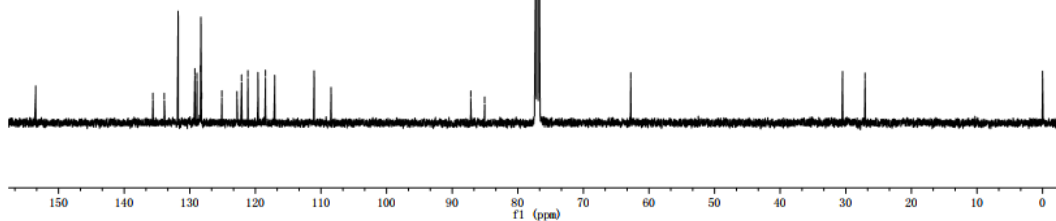





<sup>1</sup>H NMR (500 MHz, CDCl<sub>3</sub>) of compound **3d**

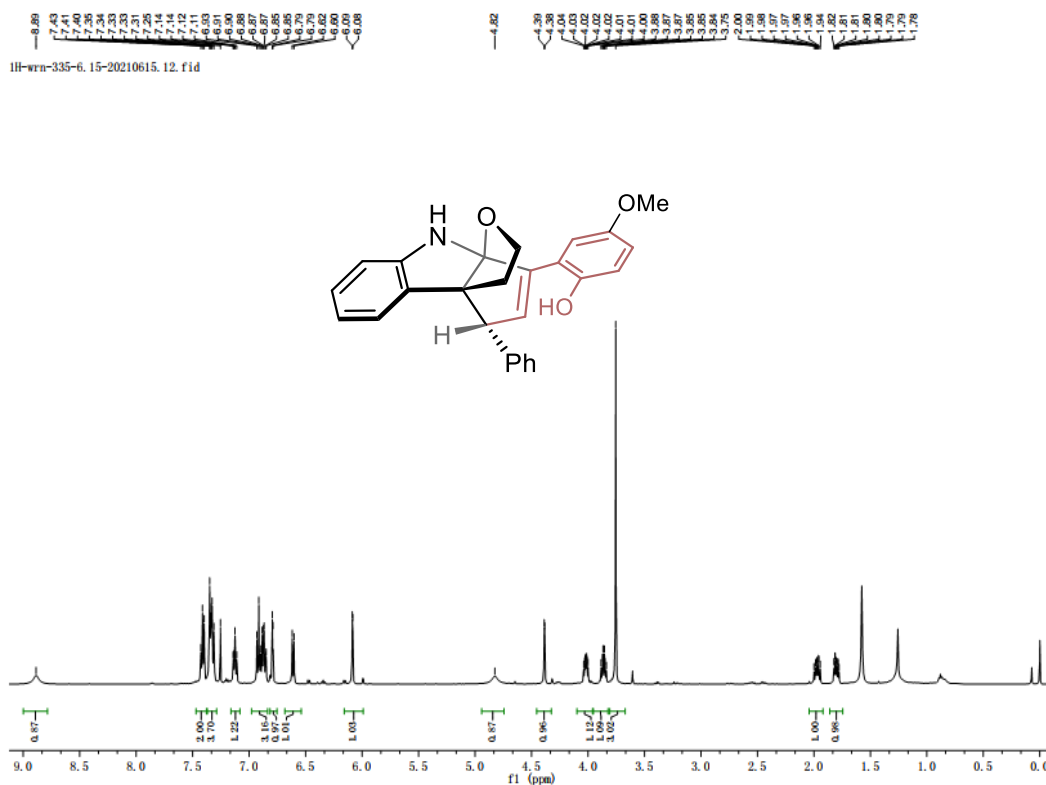

<sup>13</sup>C NMR (500 MHz, CDCl<sub>3</sub>) of compound **3d**

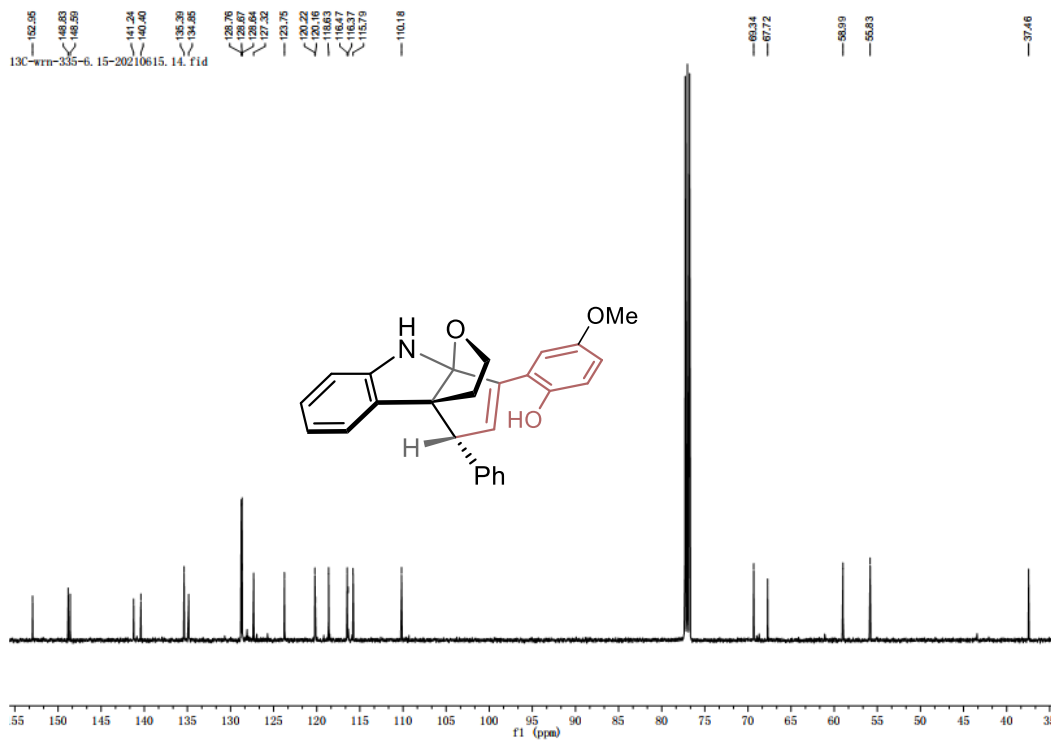



$^{19}\text{F}$  NMR (500 MHz,  $\text{CDCl}_3$ ) of compound **3e**

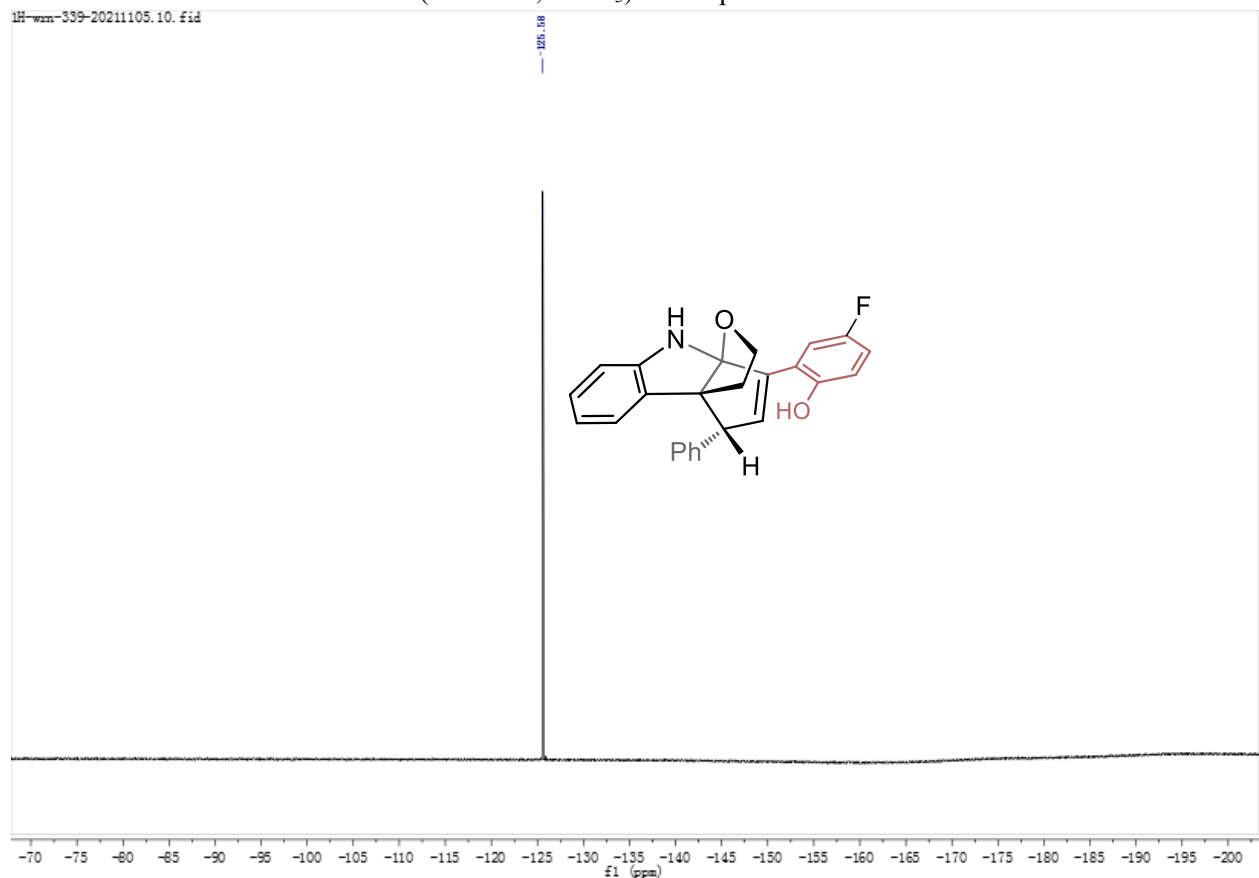

$^1\text{H}$  NMR (500 MHz,  $\text{CDCl}_3$ ) of compound **3f** (d.r. = 12:1)

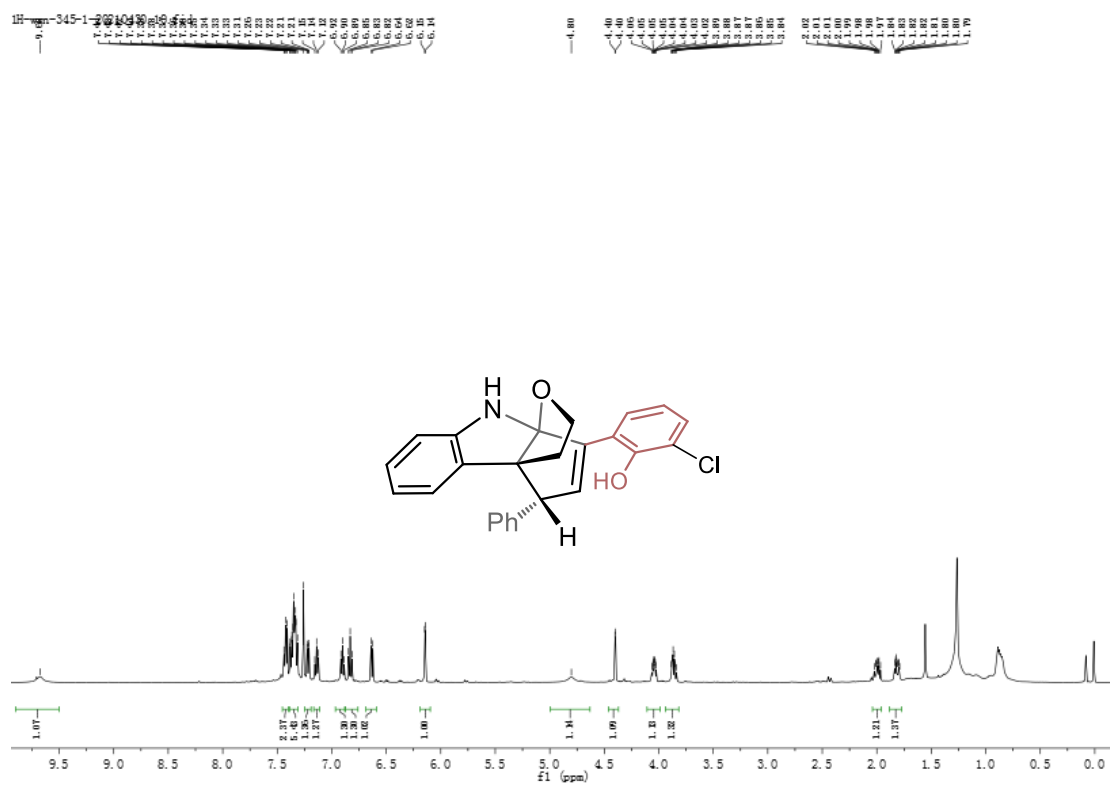

$^{13}\text{C}$  NMR (500 MHz,  $\text{CDCl}_3$ ) of compound **3f** (d.r = 12:1)

13C-wr-345-1-20210505.10.fid

149.55  
147.48  
139.44  
139.03  
133.46  
129.41  
127.55  
127.05  
126.23  
122.60  
120.80  
119.22  
119.36  
109.11

66.39  
66.16  
57.71  
36.25

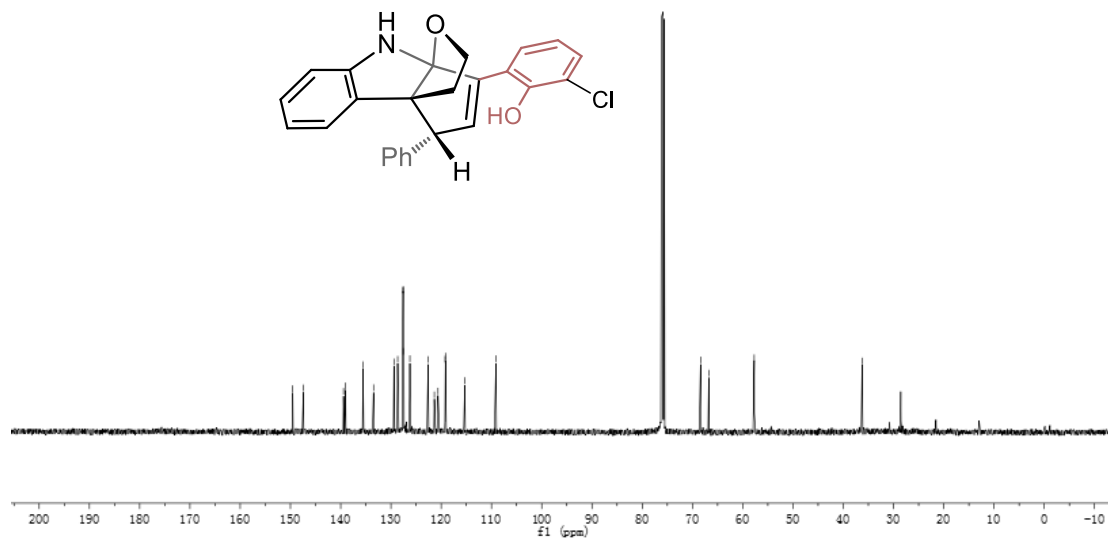

$^1\text{H}$  NMR (500 MHz,  $\text{CDCl}_3$ ) of compound **3g**

1H-wr-331-6.15-20210615.12.fid

7.63  
7.61  
7.61  
7.60  
7.59  
7.58  
7.52  
7.51  
7.47  
7.15  
7.15  
7.13  
7.13  
7.12  
7.00  
7.00  
6.91  
6.88  
6.86  
6.85  
6.84  
6.84  
6.62  
6.61  
6.60  
6.05  
4.75  
4.37  
4.37  
4.04  
4.03  
4.03  
4.02  
4.02  
4.01  
4.01  
3.87  
3.86  
3.86  
3.84  
2.01  
1.99  
1.98  
1.98  
1.97  
1.96  
1.95  
1.83  
1.82  
1.82  
1.80  
1.79  
1.78

0.95

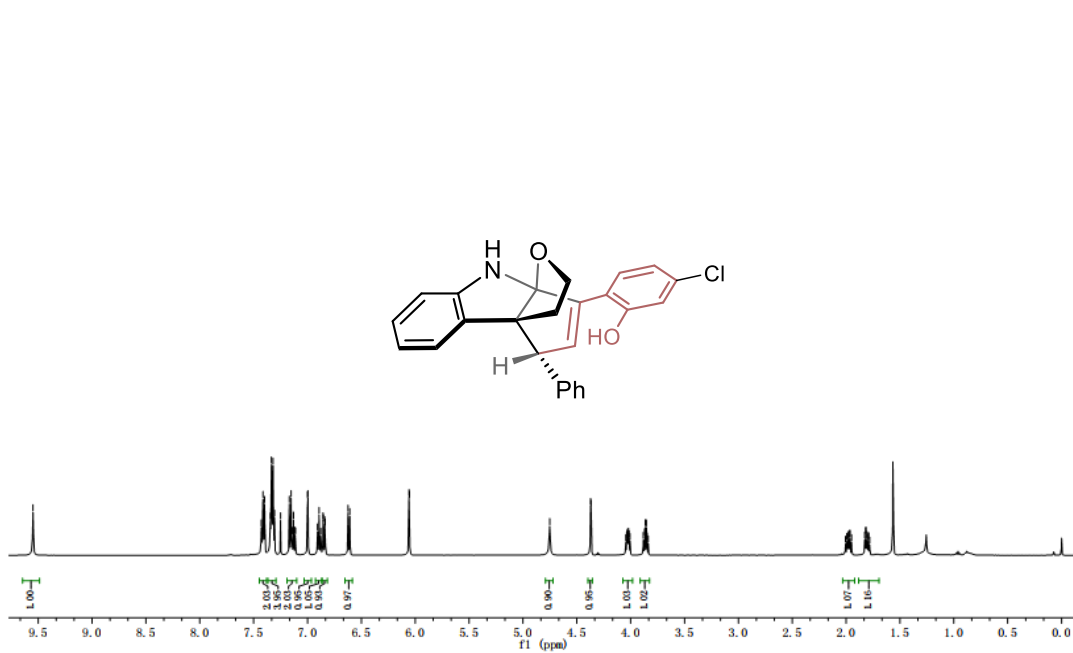





<sup>13</sup>C NMR (500 MHz, CDCl<sub>3</sub>) of compound **3h** (d.r. = 10:1)

13C-mzn-321-1-re-20210413.13.fid

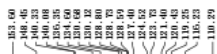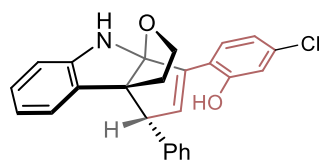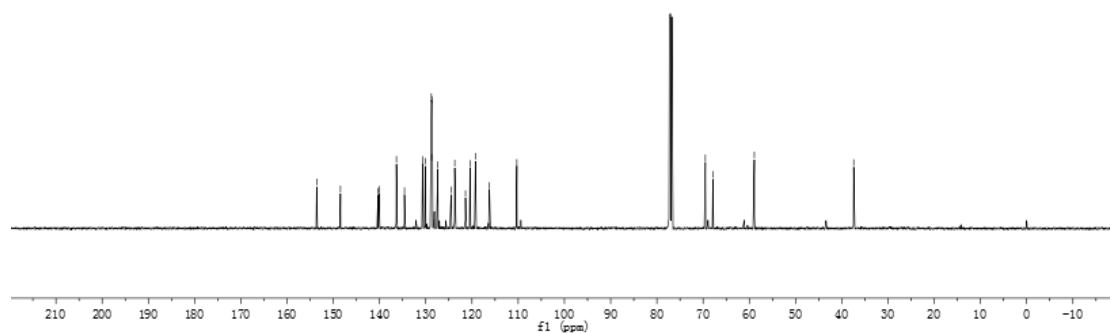

<sup>1</sup>H NMR (500 MHz, CDCl<sub>3</sub>) of compound **3i** (d.r. = 12:1)

1H-mzn-322-1-re-20210413.13.fid

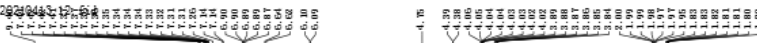



<sup>13</sup>C NMR (500 MHz, CDCl<sub>3</sub>) of compound **3j** (d.r. = 12:1)

13C-wr-348-1-20210427.14.fid

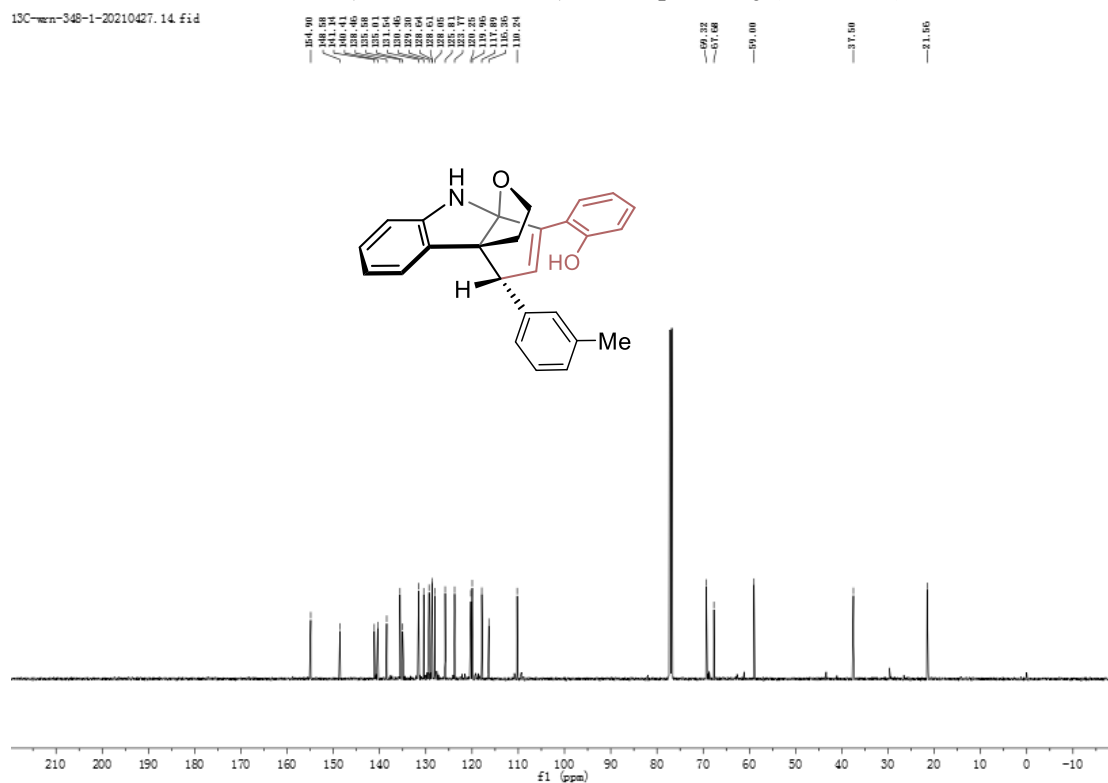

<sup>1</sup>H NMR (500 MHz, CDCl<sub>3</sub>) of compound **3k**

1H-wr-329-1-re-20210420.12.fid

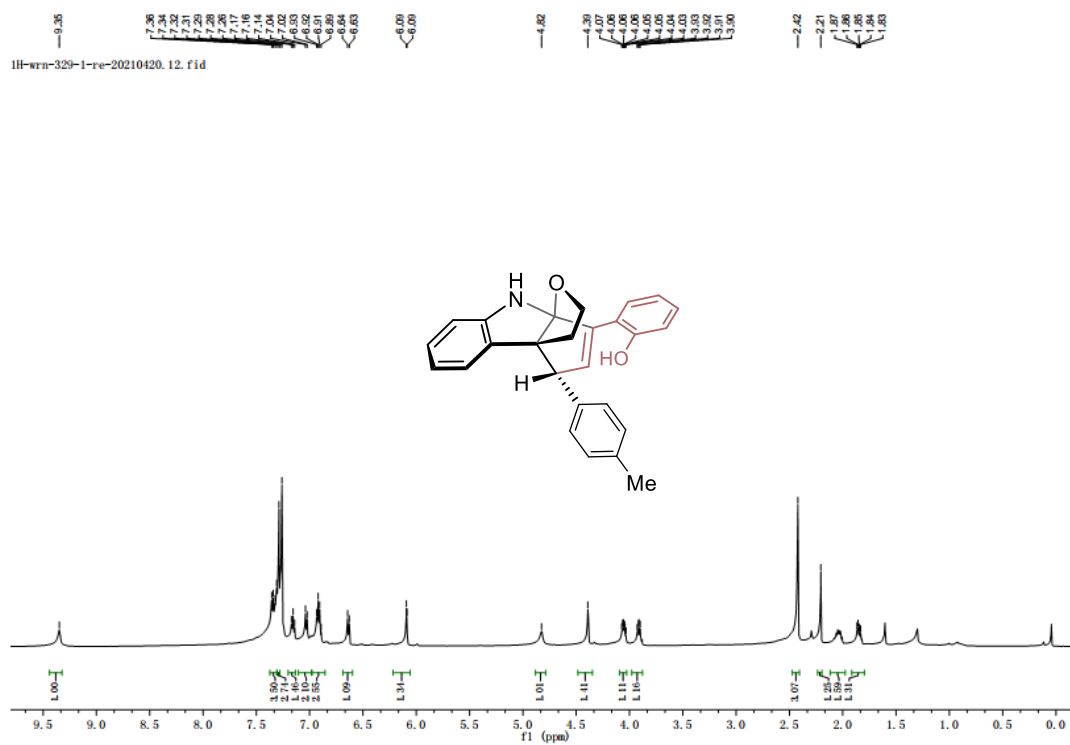

<sup>13</sup>C NMR (500 MHz, CDCl<sub>3</sub>) of compound **3k**

13C-wr-329-1-re-20210421.10.fid

154.90  
145.57  
144.30  
137.38  
135.97  
135.04  
131.51  
129.45  
128.68  
123.75  
120.23  
119.93  
117.87  
116.71  
110.22

69.29  
67.99

68.74

37.47

30.90

21.30

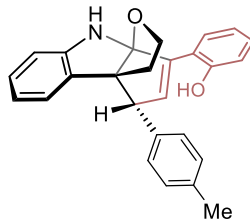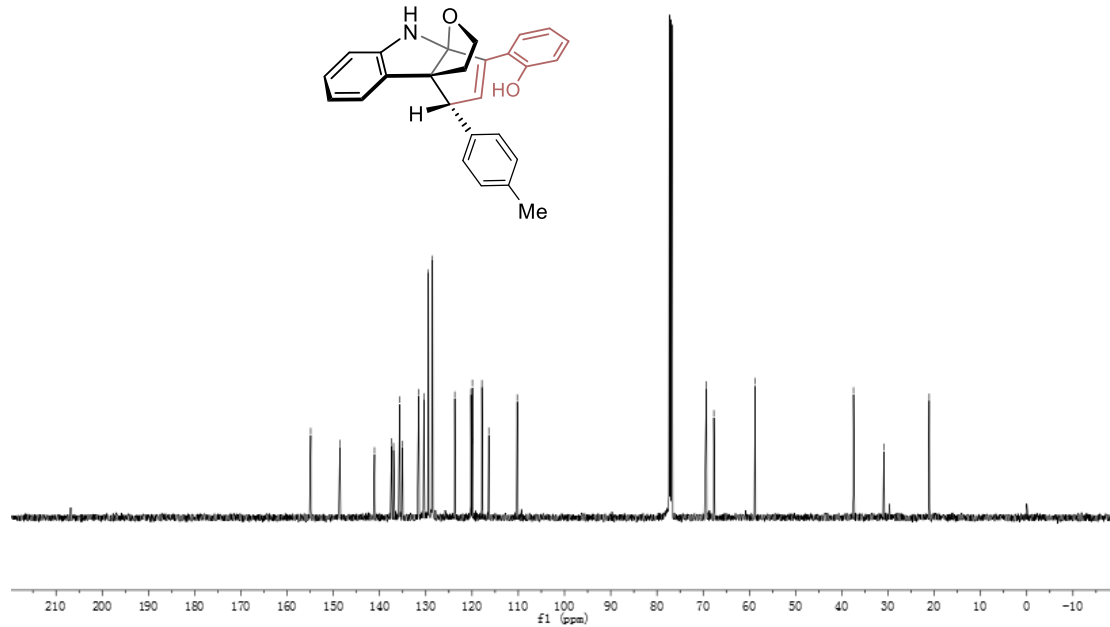

<sup>1</sup>H NMR (500 MHz, CDCl<sub>3</sub>) of compound **3l**

1H-wr-330-1-re-20210420.12.fid

9.32  
7.23  
7.22  
7.20  
7.28  
7.26  
7.14  
7.14  
7.13  
7.11  
7.11  
7.01  
6.99  
6.91  
6.87  
6.86  
6.86  
6.80  
6.06  
4.79  
4.27  
4.26  
4.05  
4.05  
4.03  
4.03  
4.02  
4.02  
4.01  
3.90  
3.89  
3.87  
3.86  
2.70  
2.67  
2.67  
2.17  
2.17  
2.03  
2.02  
2.02  
2.01  
2.01  
1.98  
1.94  
1.83  
1.82  
1.81  
1.80  
1.26  
1.26

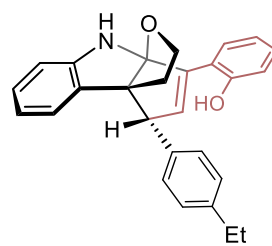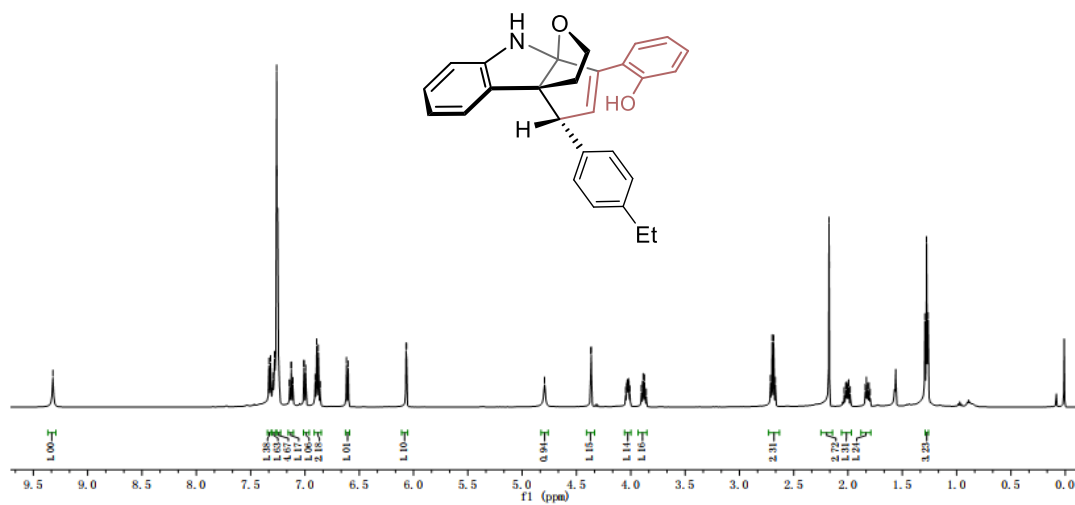

<sup>13</sup>C NMR (500 MHz, CDCl<sub>3</sub>) of compound **3l**

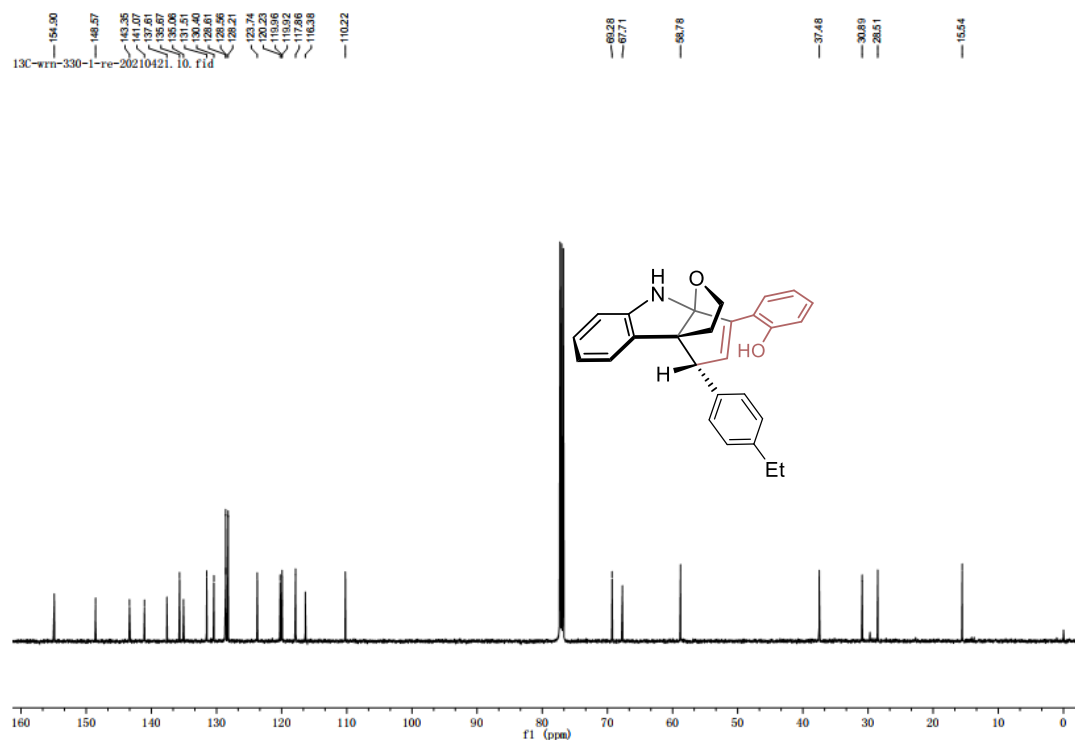

<sup>1</sup>H NMR (500 MHz, CDCl<sub>3</sub>) of compound **3m**

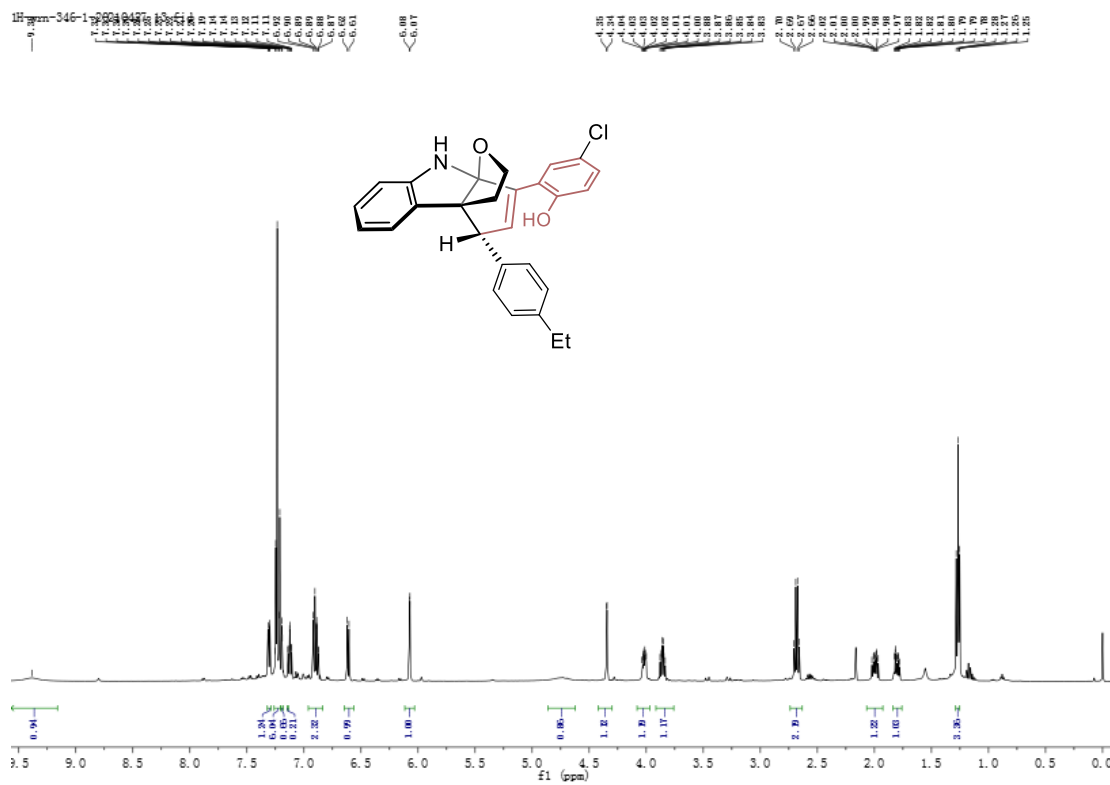



$^{13}\text{C}$  NMR (500 MHz,  $\text{CDCl}_3$ ) of compound **3n**

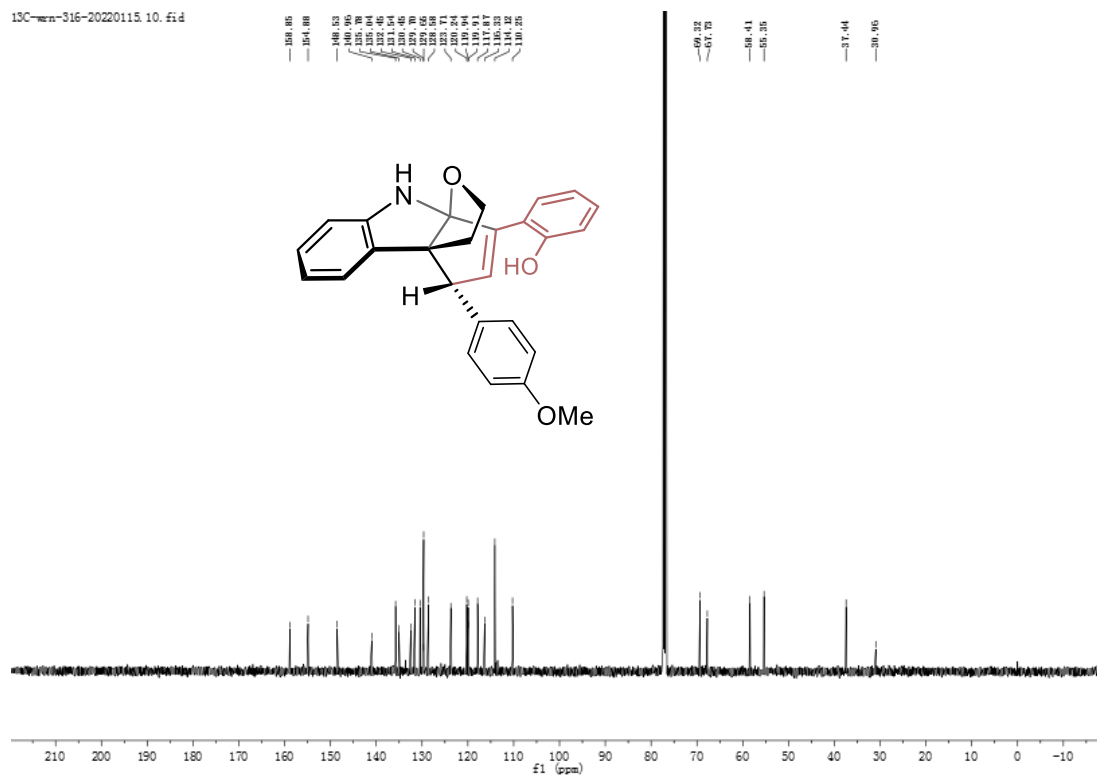

$^1\text{H}$  NMR (500 MHz,  $\text{CDCl}_3$ ) of compound **3o** (d.r. = 8:1)

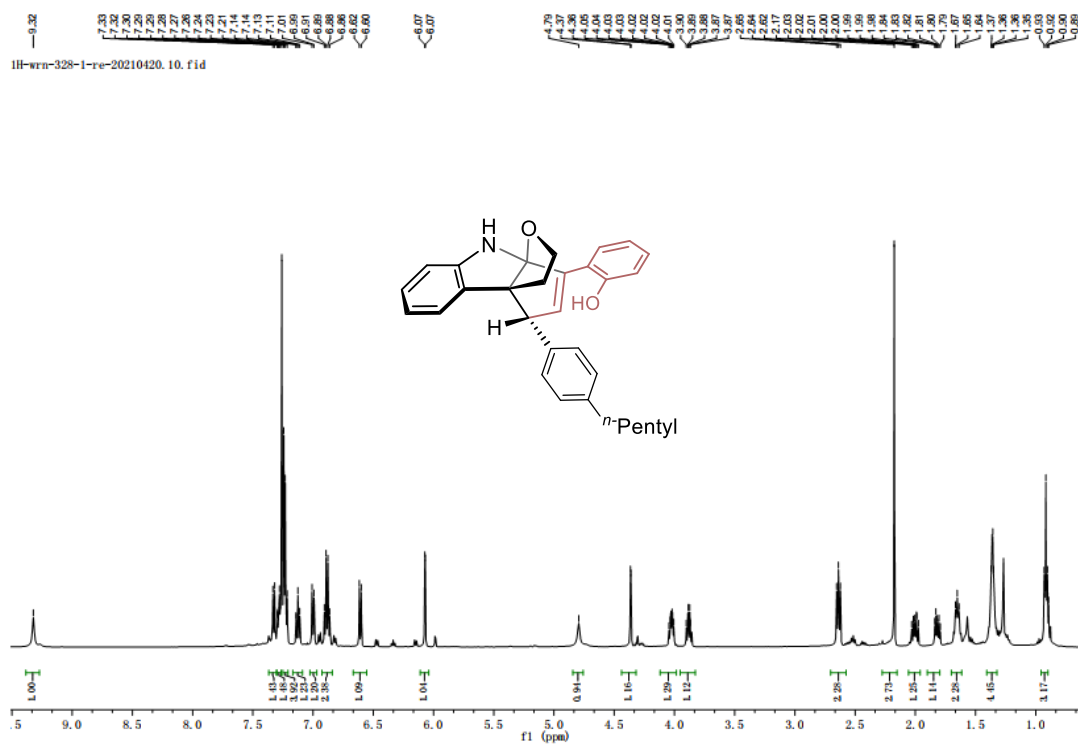







<sup>13</sup>C NMR (500 MHz, CDCl<sub>3</sub>) of compound **3q** (d.r. = 12:1)

13C-nrn-352-1-20210505.10.fid

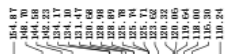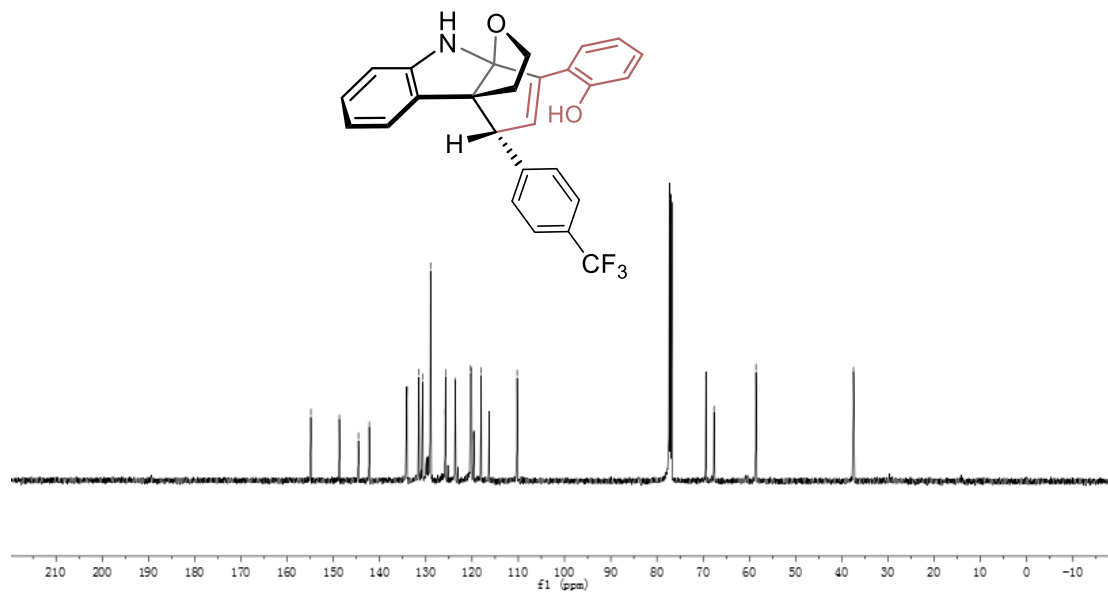

<sup>19</sup>F NMR (500 MHz, CDCl<sub>3</sub>) of compound **3q**

19F-nrn-352-20211105.10.fid

162.43

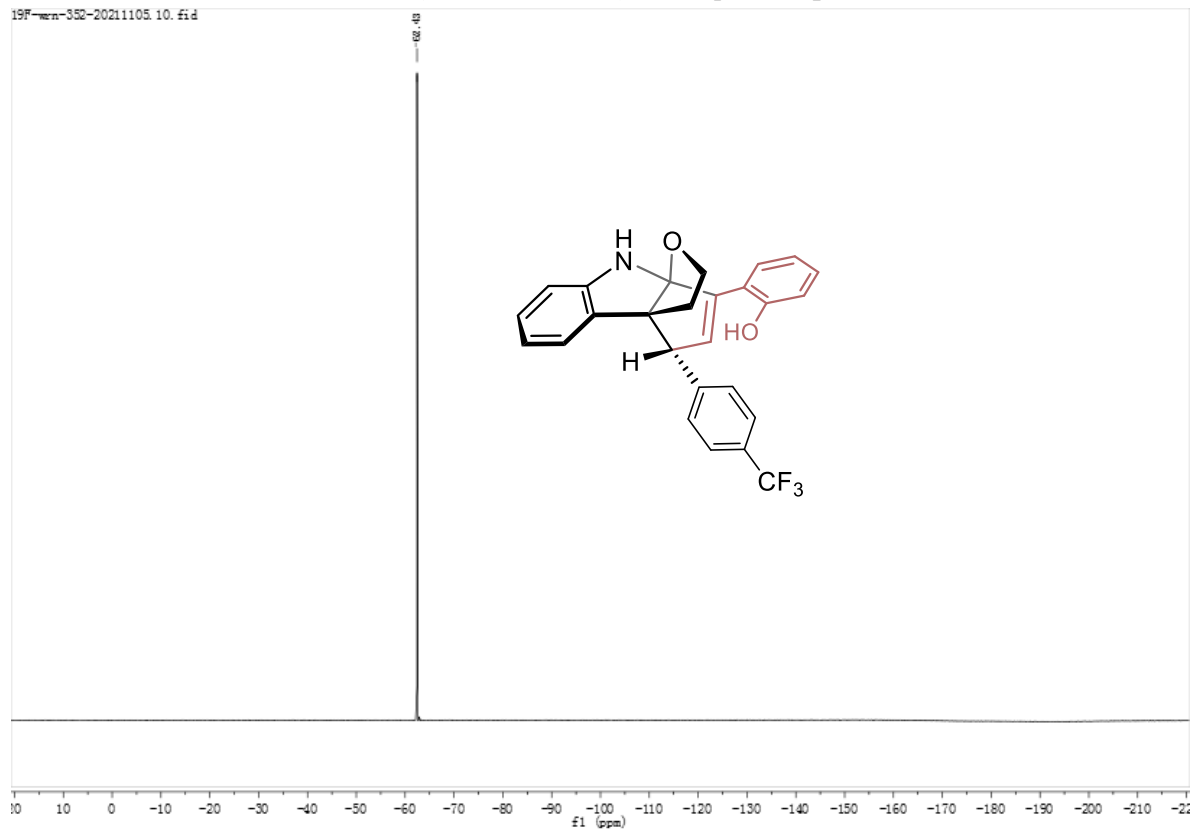



<sup>1</sup>H NMR (500 MHz, CDCl<sub>3</sub>) of compound **3s**

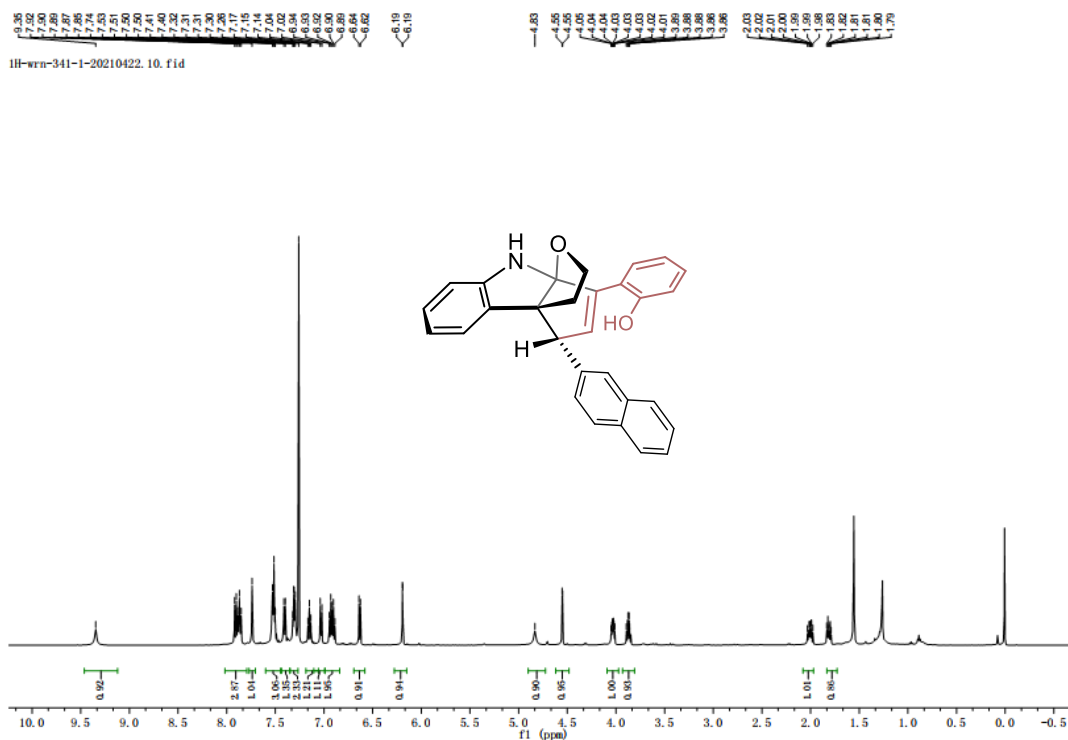

<sup>1</sup>H NMR (500 MHz, CDCl<sub>3</sub>) of compound **3t** (d.r. = 5:1)

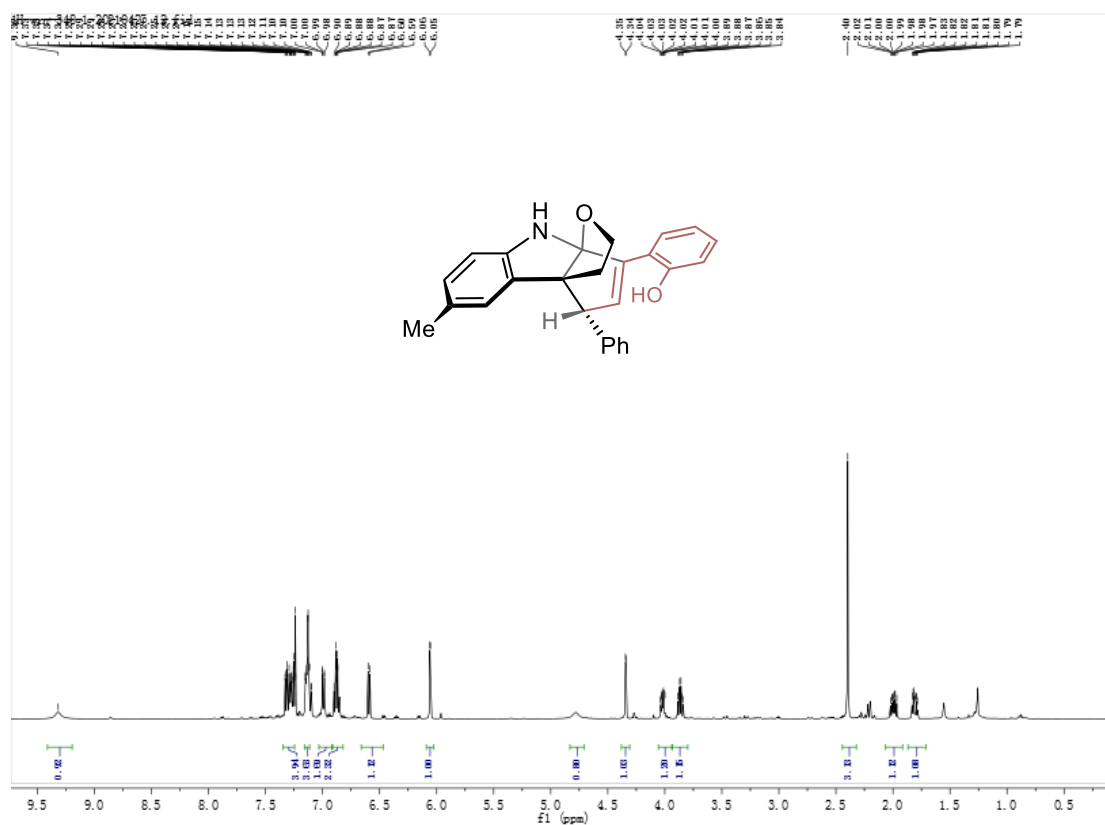

<sup>13</sup>C NMR (500 MHz, CDCl<sub>3</sub>) of compound **3t** (d.r. = 5:1)

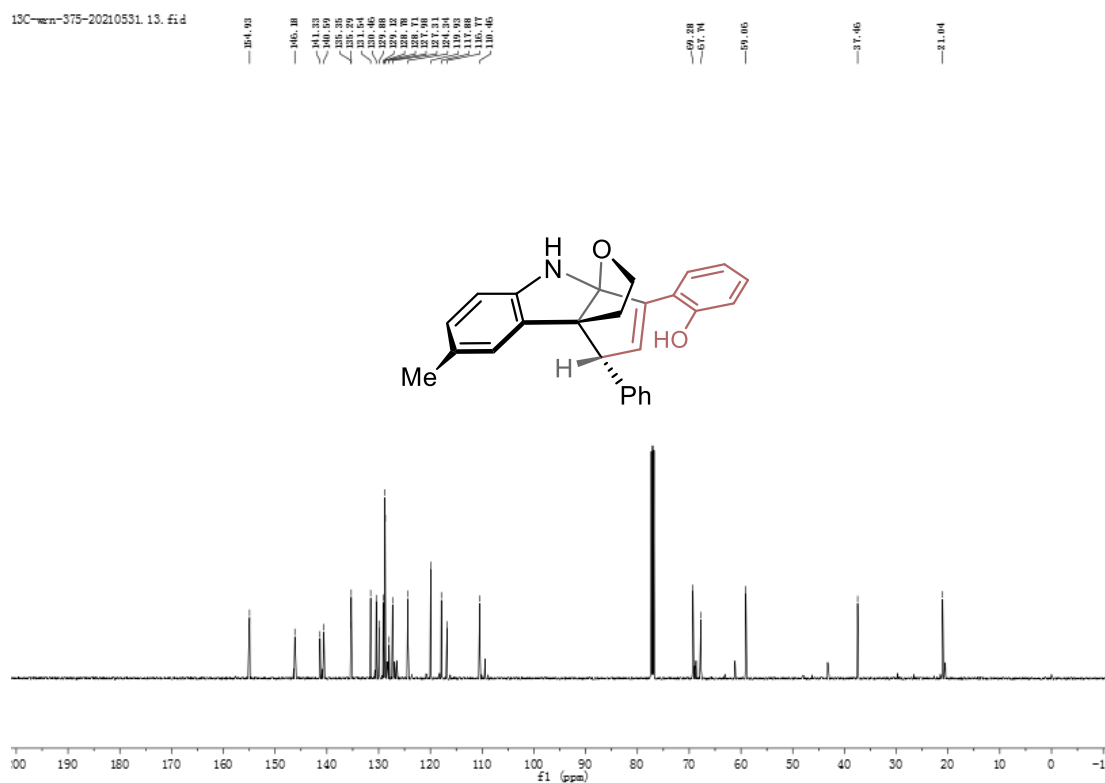







<sup>1</sup>H NMR (500 MHz, CDCl<sub>3</sub>) of compound **3w**

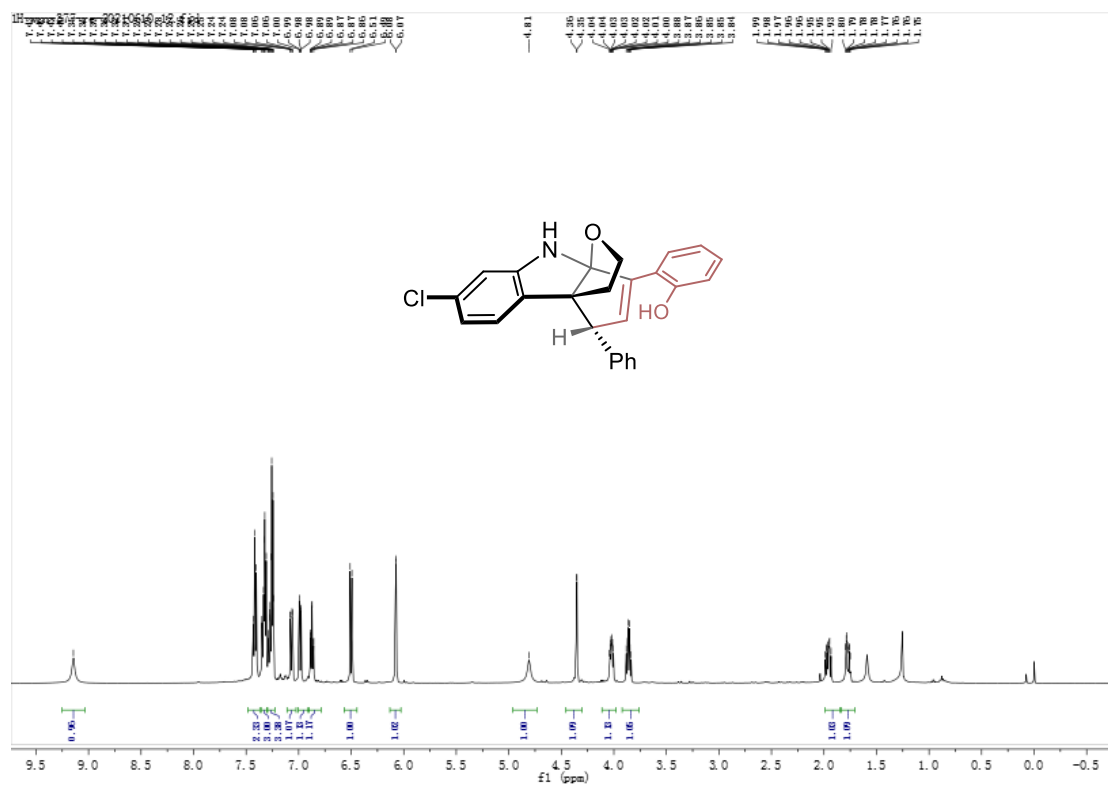

<sup>13</sup>C NMR (500 MHz, CDCl<sub>3</sub>) of compound **3w**

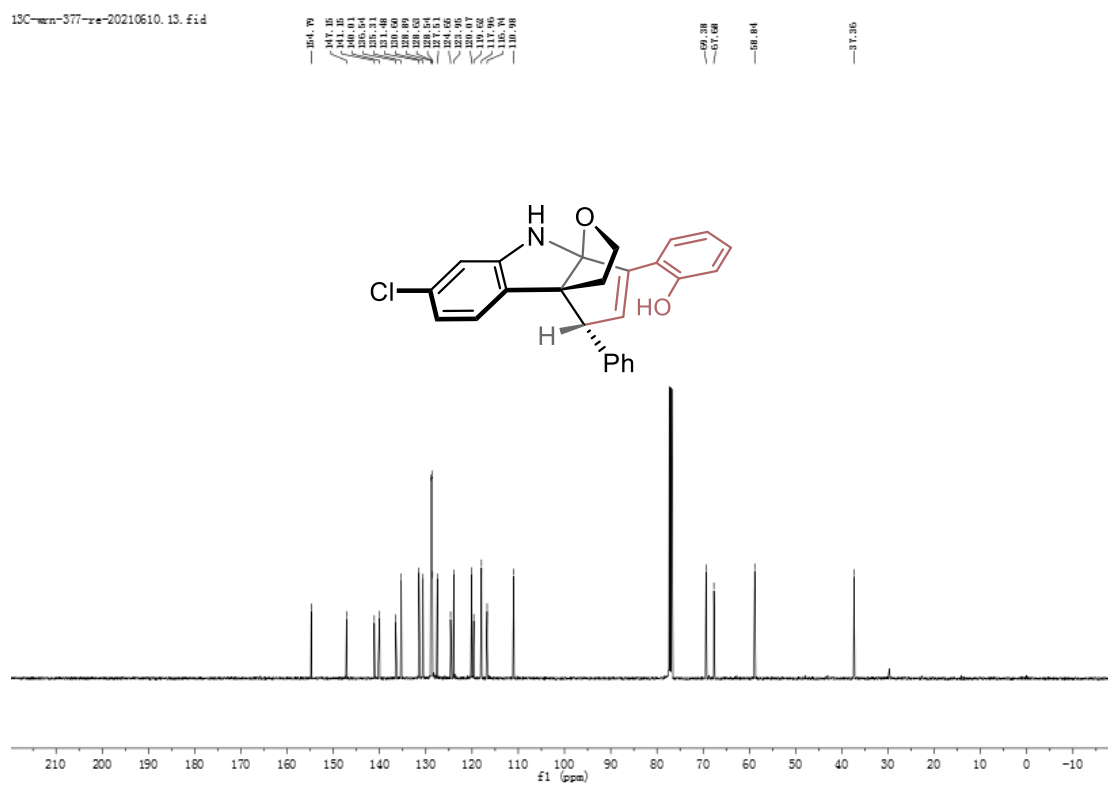

$^1\text{H}$  NMR (500 MHz,  $\text{CDCl}_3$ ) of compound **3x** (d.r. = 2:1)

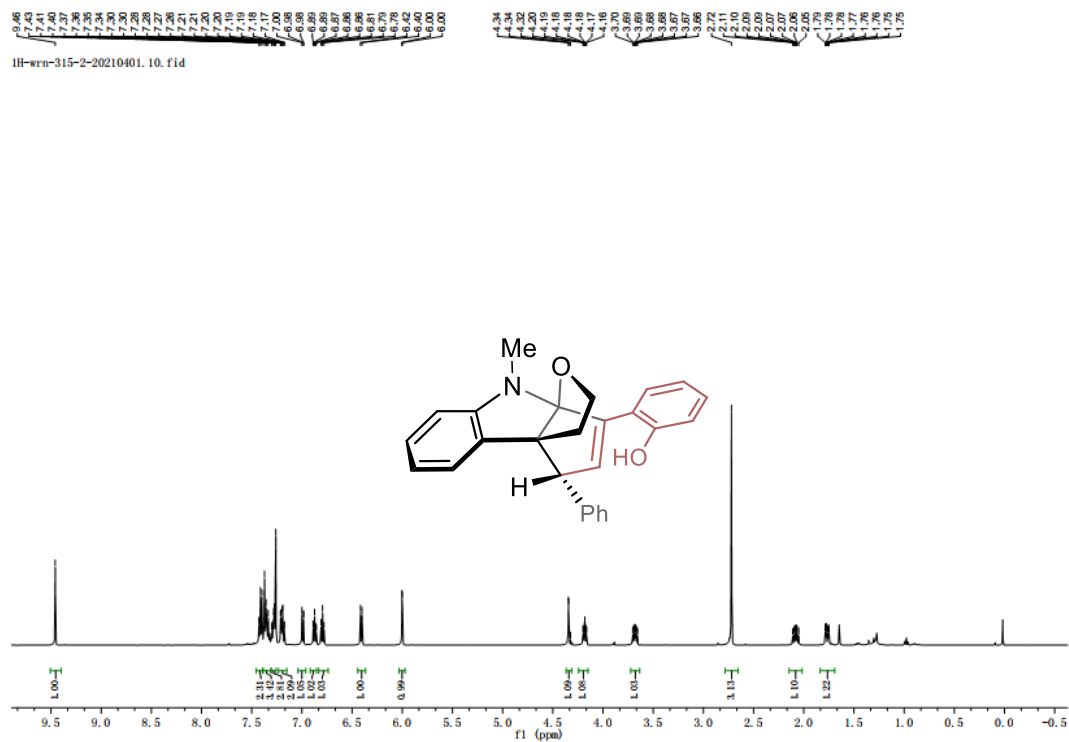

$^{13}\text{C}$  NMR (500 MHz,  $\text{CDCl}_3$ ) of compound **3x** (d.r. = 2:1)

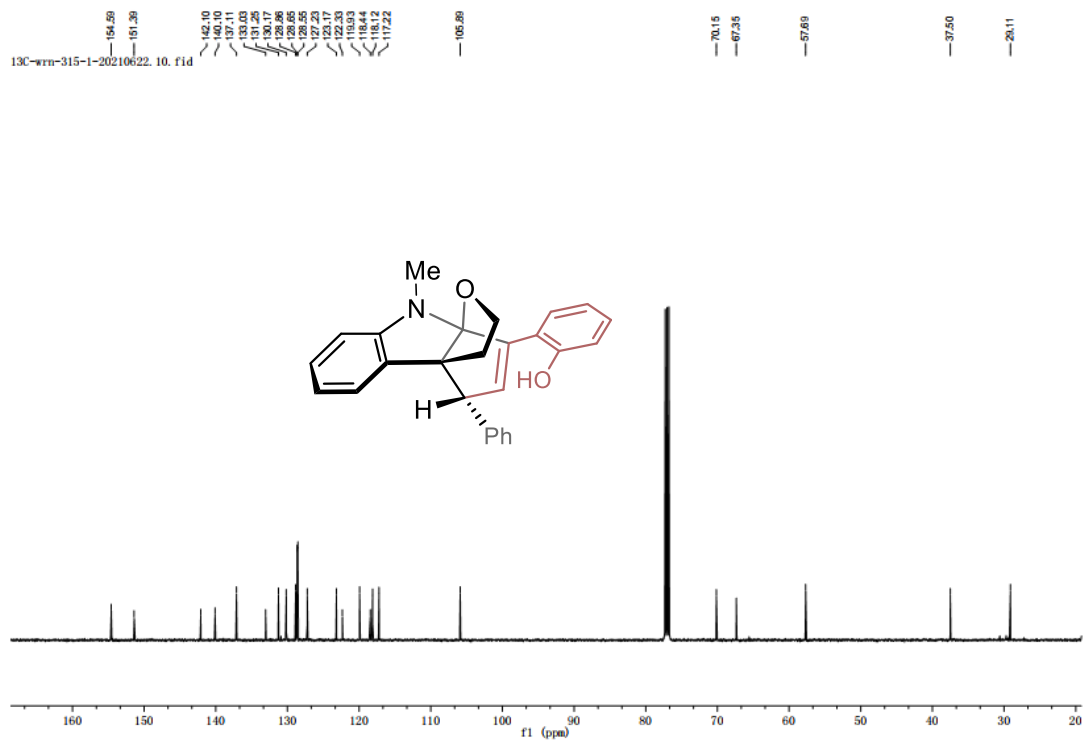

$^1\text{H}$  NMR (500 MHz,  $\text{CDCl}_3$ ) of compound **3y** (d.r. = 2:1)

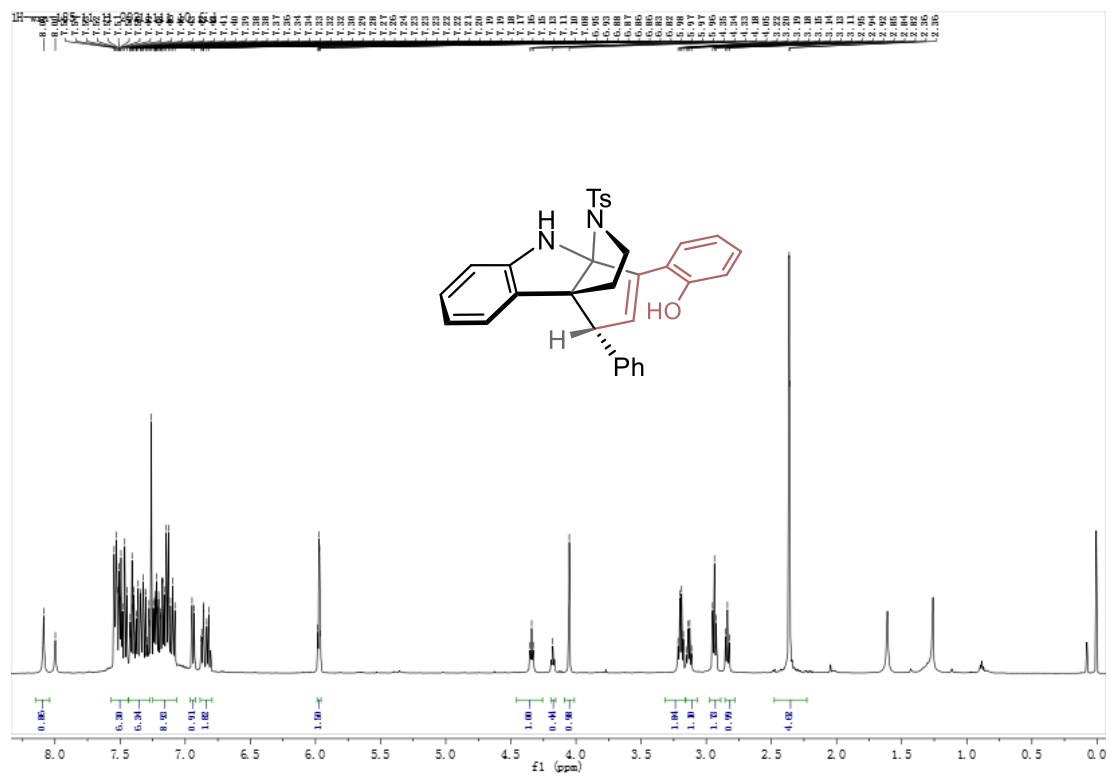

$^{13}\text{C}$  NMR (500 MHz,  $\text{CDCl}_3$ ) of compound **3y** (d.r. = 2:1)

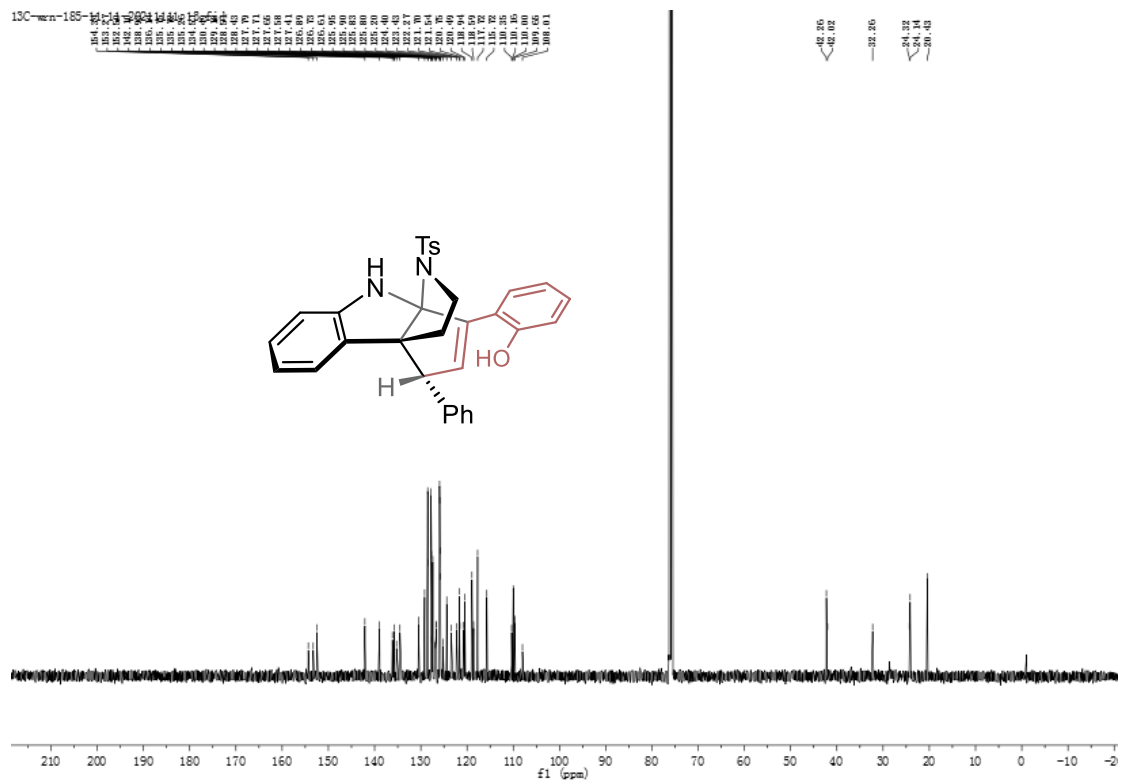



<sup>1</sup>H NMR (500 MHz, CDCl<sub>3</sub>) of compound 5

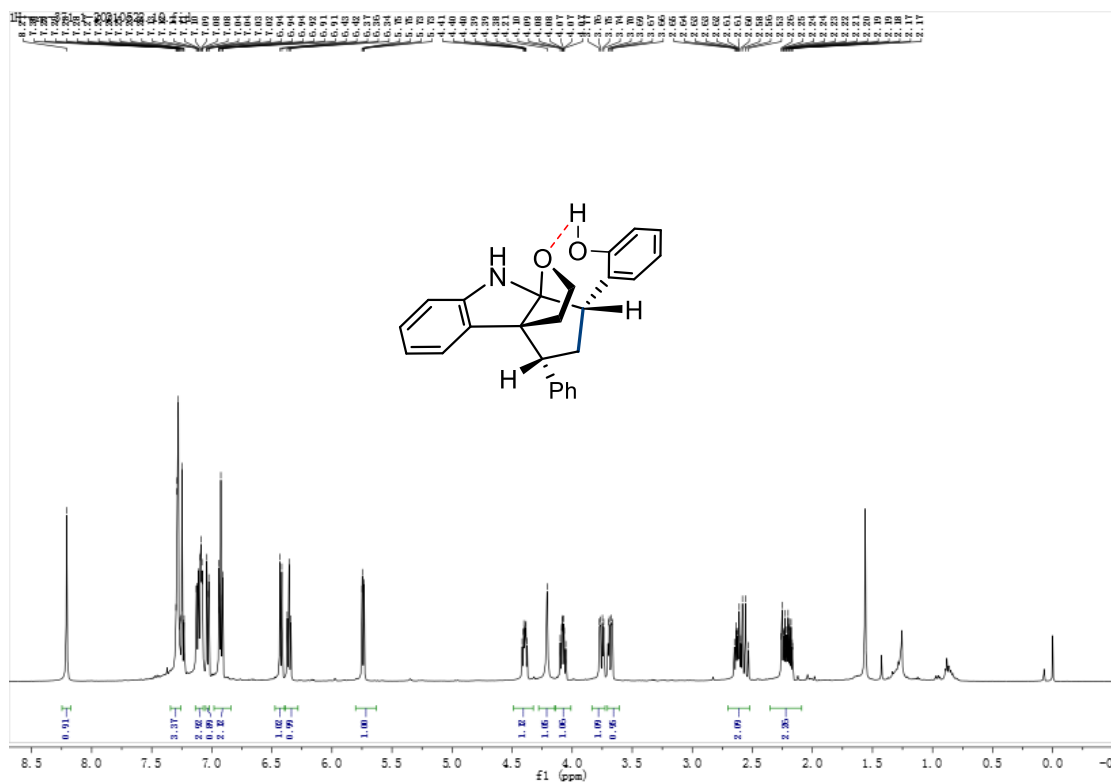

<sup>13</sup>C NMR (500 MHz, CDCl<sub>3</sub>) of compound 5

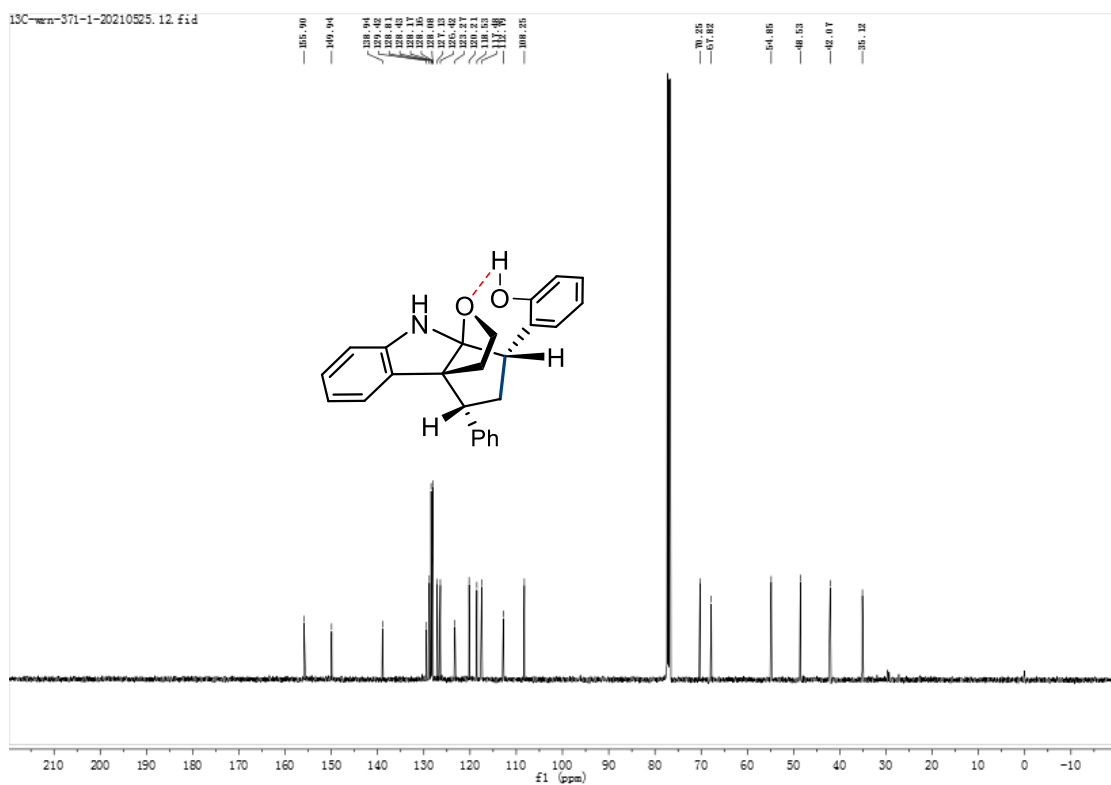



<sup>1</sup>H NMR (500 MHz, CDCl<sub>3</sub>) of compound 7 (d.r. = 1:1)

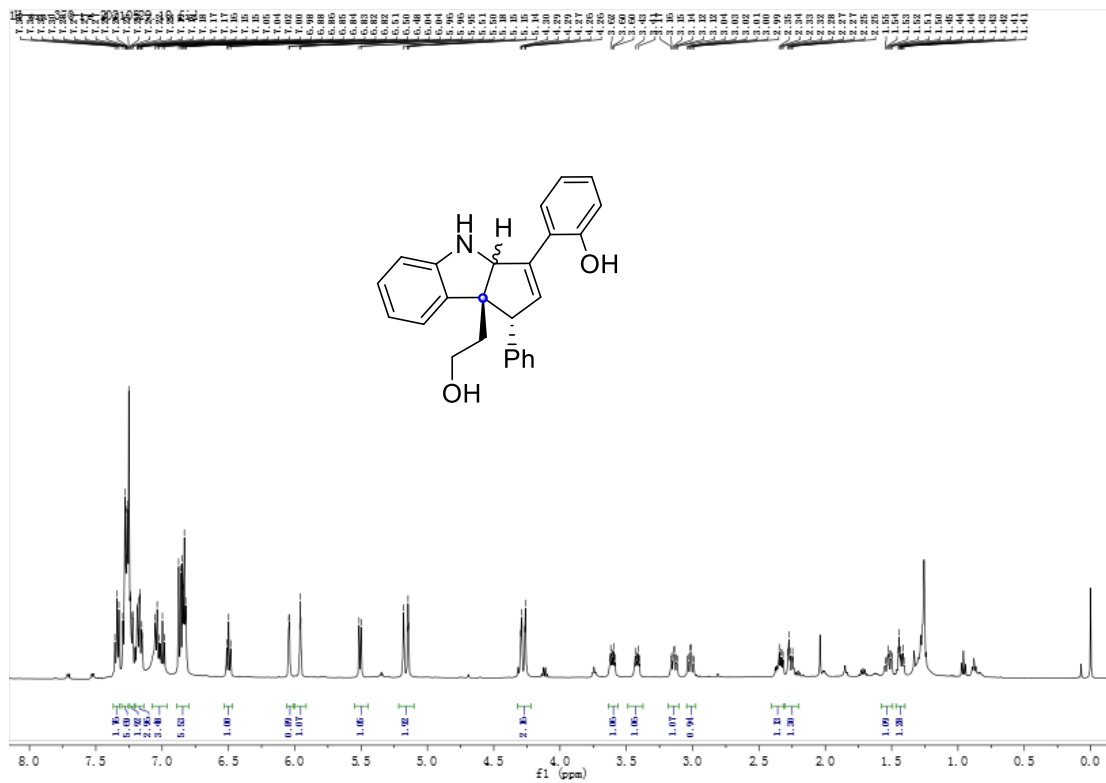

<sup>13</sup>C NMR (500 MHz, CDCl<sub>3</sub>) of compound 7 (d.r. = 1:1)

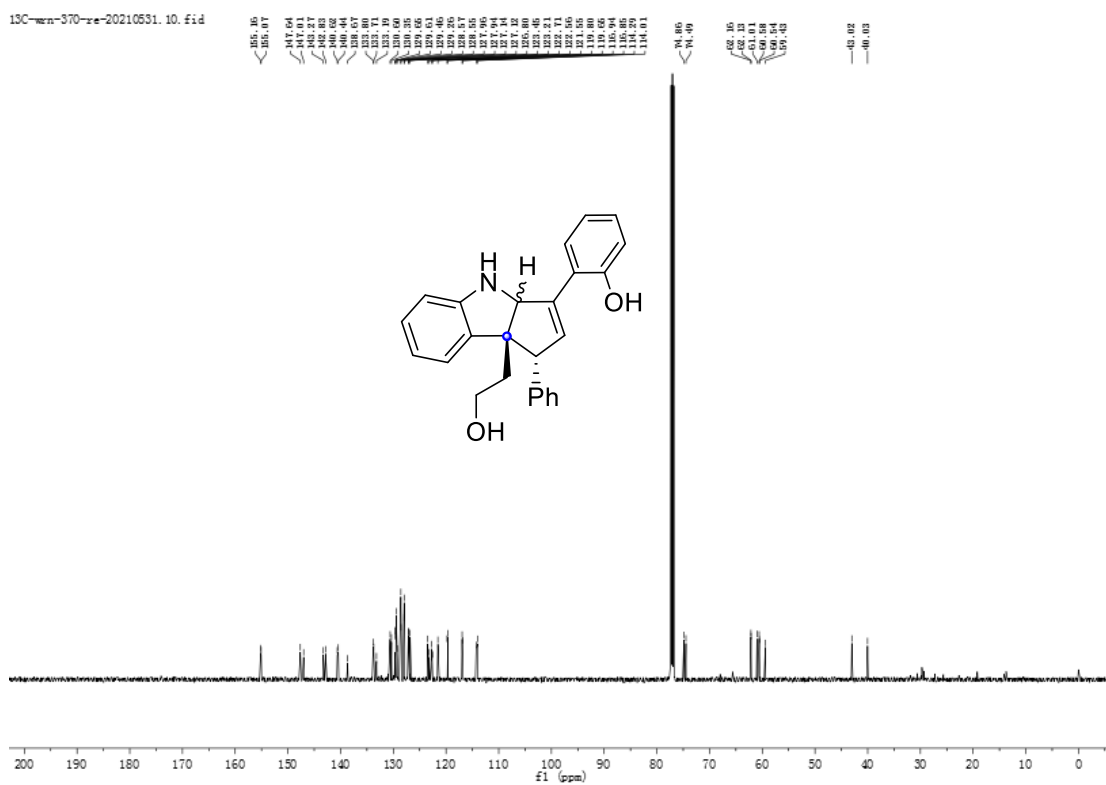

项目名称: Ge Xiao-Min  
用户名称: Breeze 用户 (Breeze)

### 样品信息

|       |                        |         |                         |
|-------|------------------------|---------|-------------------------|
| 样品名称: | rac-0119               | 采集者:    | Breeze                  |
| 样品类型: | 标准样                    | 样品组名称:  | An                      |
| 瓶号:   | 1:A,1                  | 采集方法组:  | 1 mL IB3 HexvsIpr 95vs5 |
| 进样次数: | 1                      | 处理方法:   | hex vs iPr 95vs5        |
| 进样体积: | 3.00 ul                | 通道名称:   | 254.0 纳米                |
| 运行时间: | 30.0 Minutes           | 处理通道注释: | PDA 254.0 纳米            |
| 采集时间: | 2021/1/19 22:16:00 CST | 色谱柱类型:  | PDA 254.0 纳米            |
| 处理时间: | 2021/1/19 23:01:12 CST |         |                         |

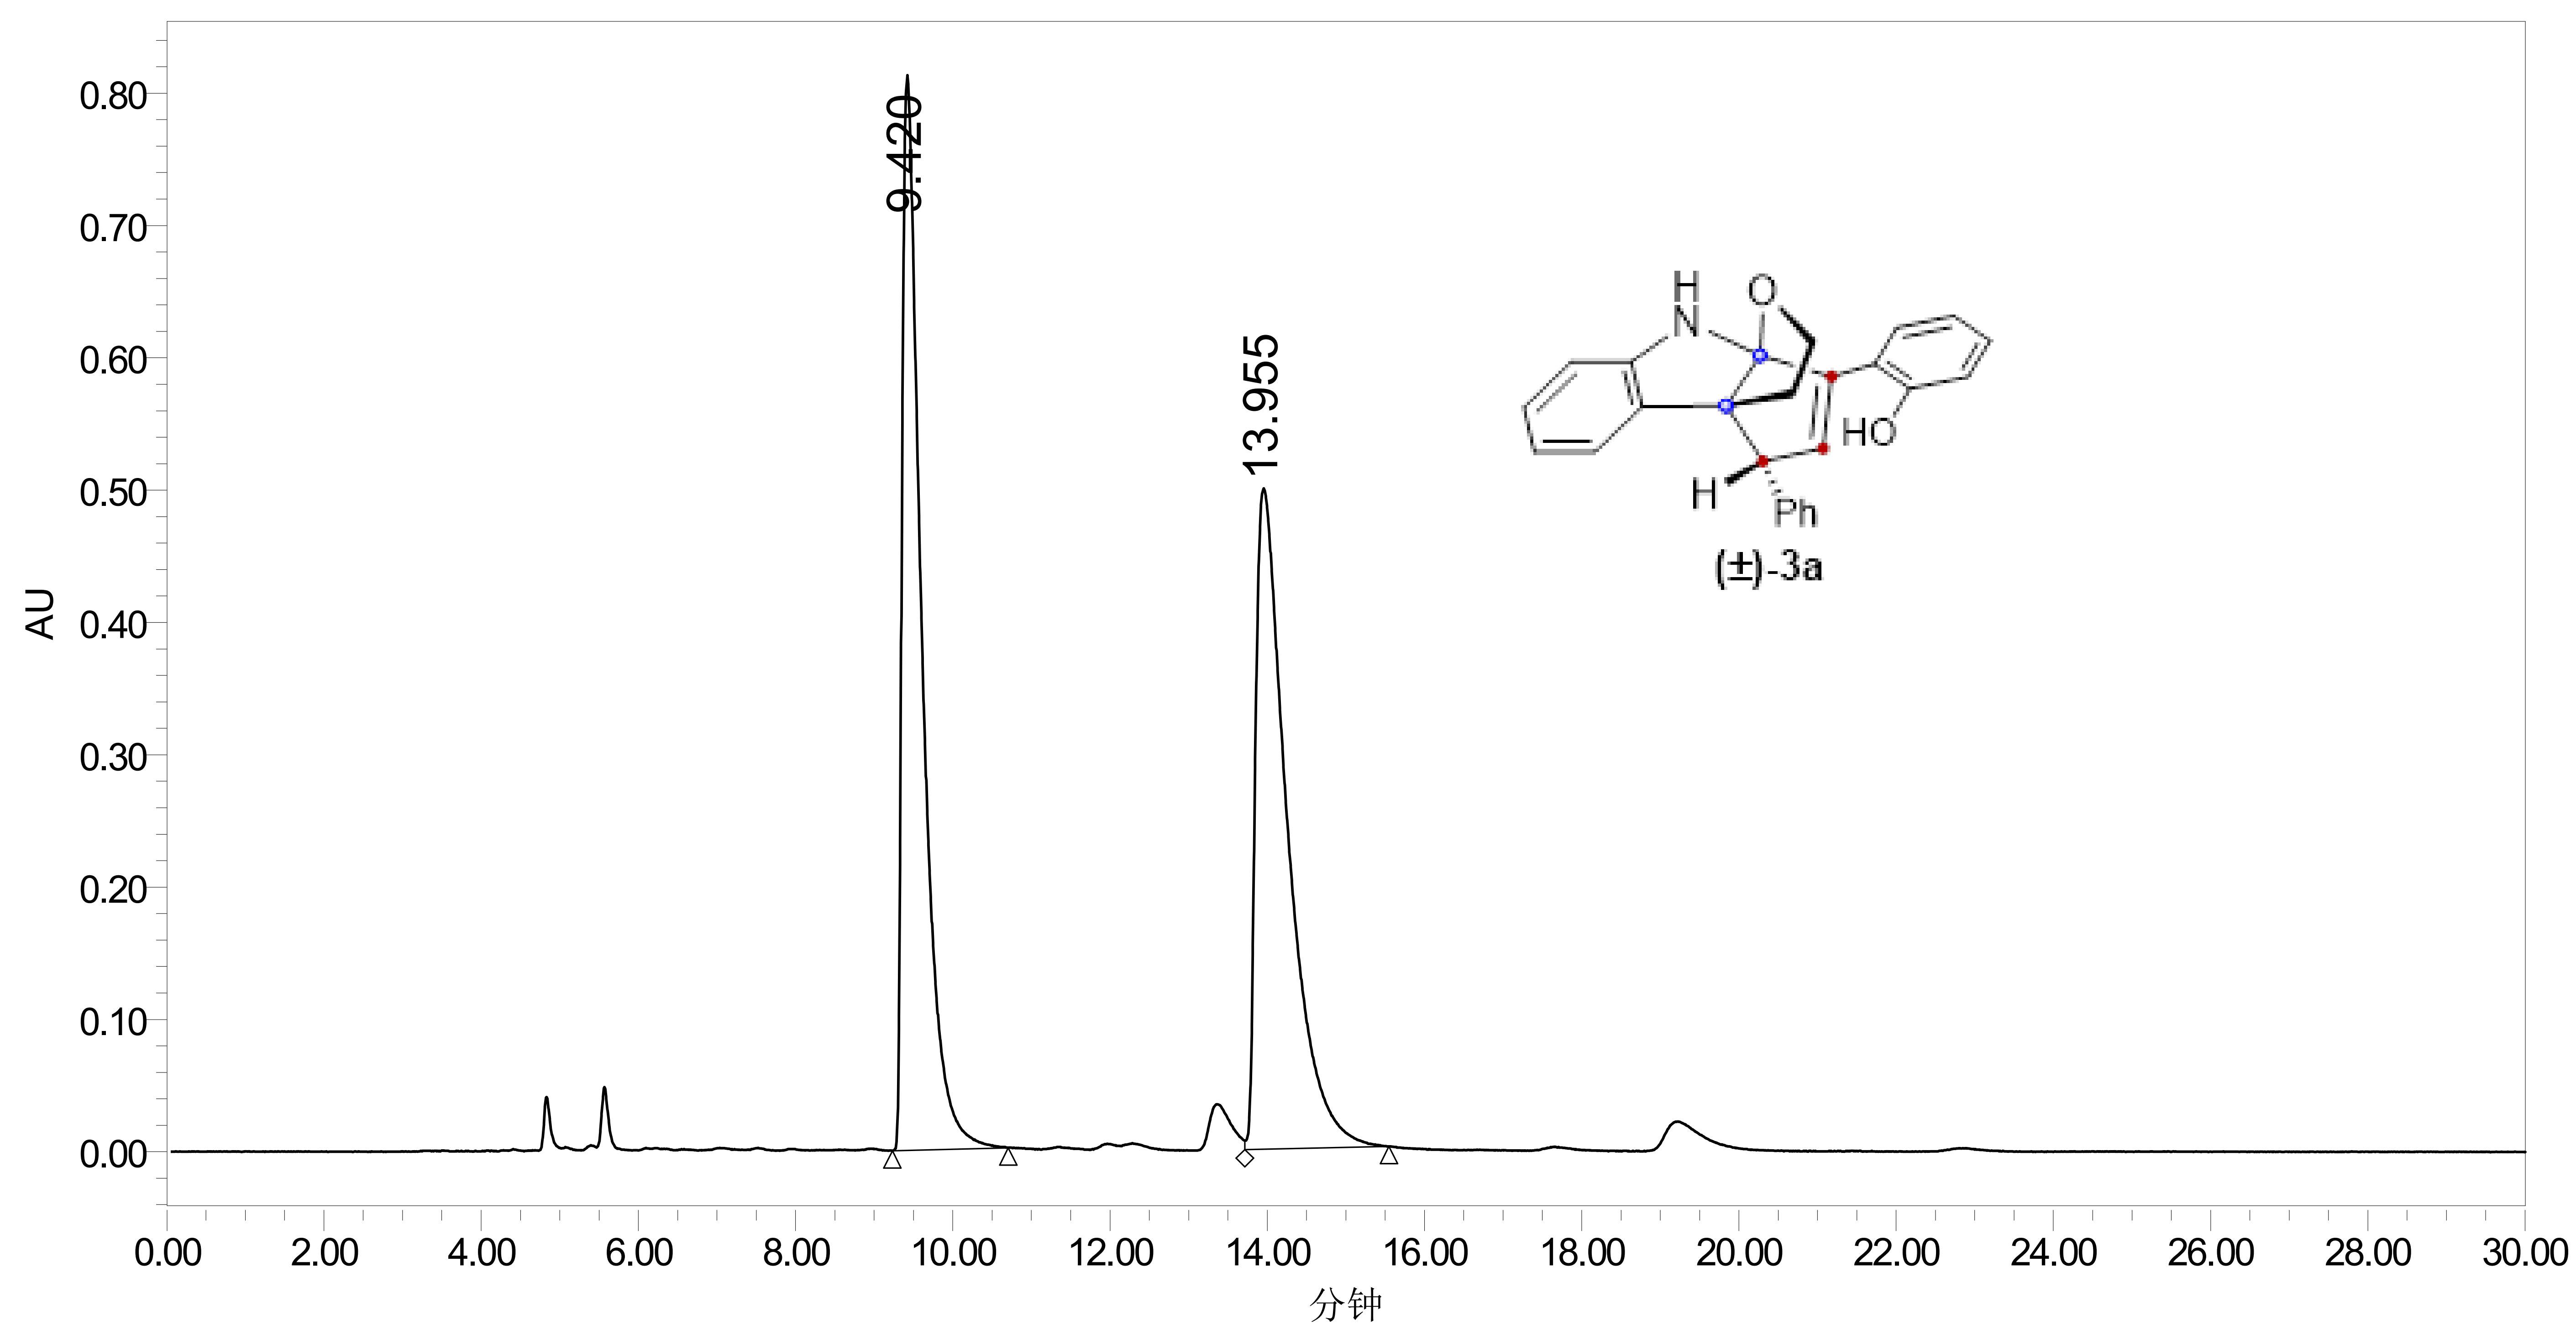

|   | 保留时间<br>(分钟) | 面积<br>(微伏*秒) | % 面积  | 高度<br>(微伏) | % 高度  |
|---|--------------|--------------|-------|------------|-------|
| 1 | 9.420        | 14174560     | 50.05 | 812555     | 61.93 |
| 2 | 13.955       | 14145261     | 49.95 | 499597     | 38.07 |



项目名称: Ge Xiao-Min  
用户名称: Breeze 用户 (Breeze)

### 样品信息

|       |                        |         |                         |
|-------|------------------------|---------|-------------------------|
| 样品名称: | 2                      | 采集者:    | Breeze                  |
| 样品类型: | 标准样                    | 样品组名称:  | An                      |
| 瓶号:   | 1:A,3                  | 采集方法组:  | 1 mL IB3 HexvsIpr 95vs5 |
| 进样次数: | 1                      | 处理方法:   | hex vs iPr 95vs5        |
| 进样体积: | 5.00 ul                | 通道名称:   | 254.0 纳米                |
| 运行时间: | 30.0 Minutes           | 处理通道注释: | PDA 254.0 纳米            |
| 采集时间: | 2021/1/20 13:26:55 CST | 色谱柱类型:  | PDA 254.0 纳米            |
| 处理时间: | 2021/1/20 14:08:20 CST |         |                         |

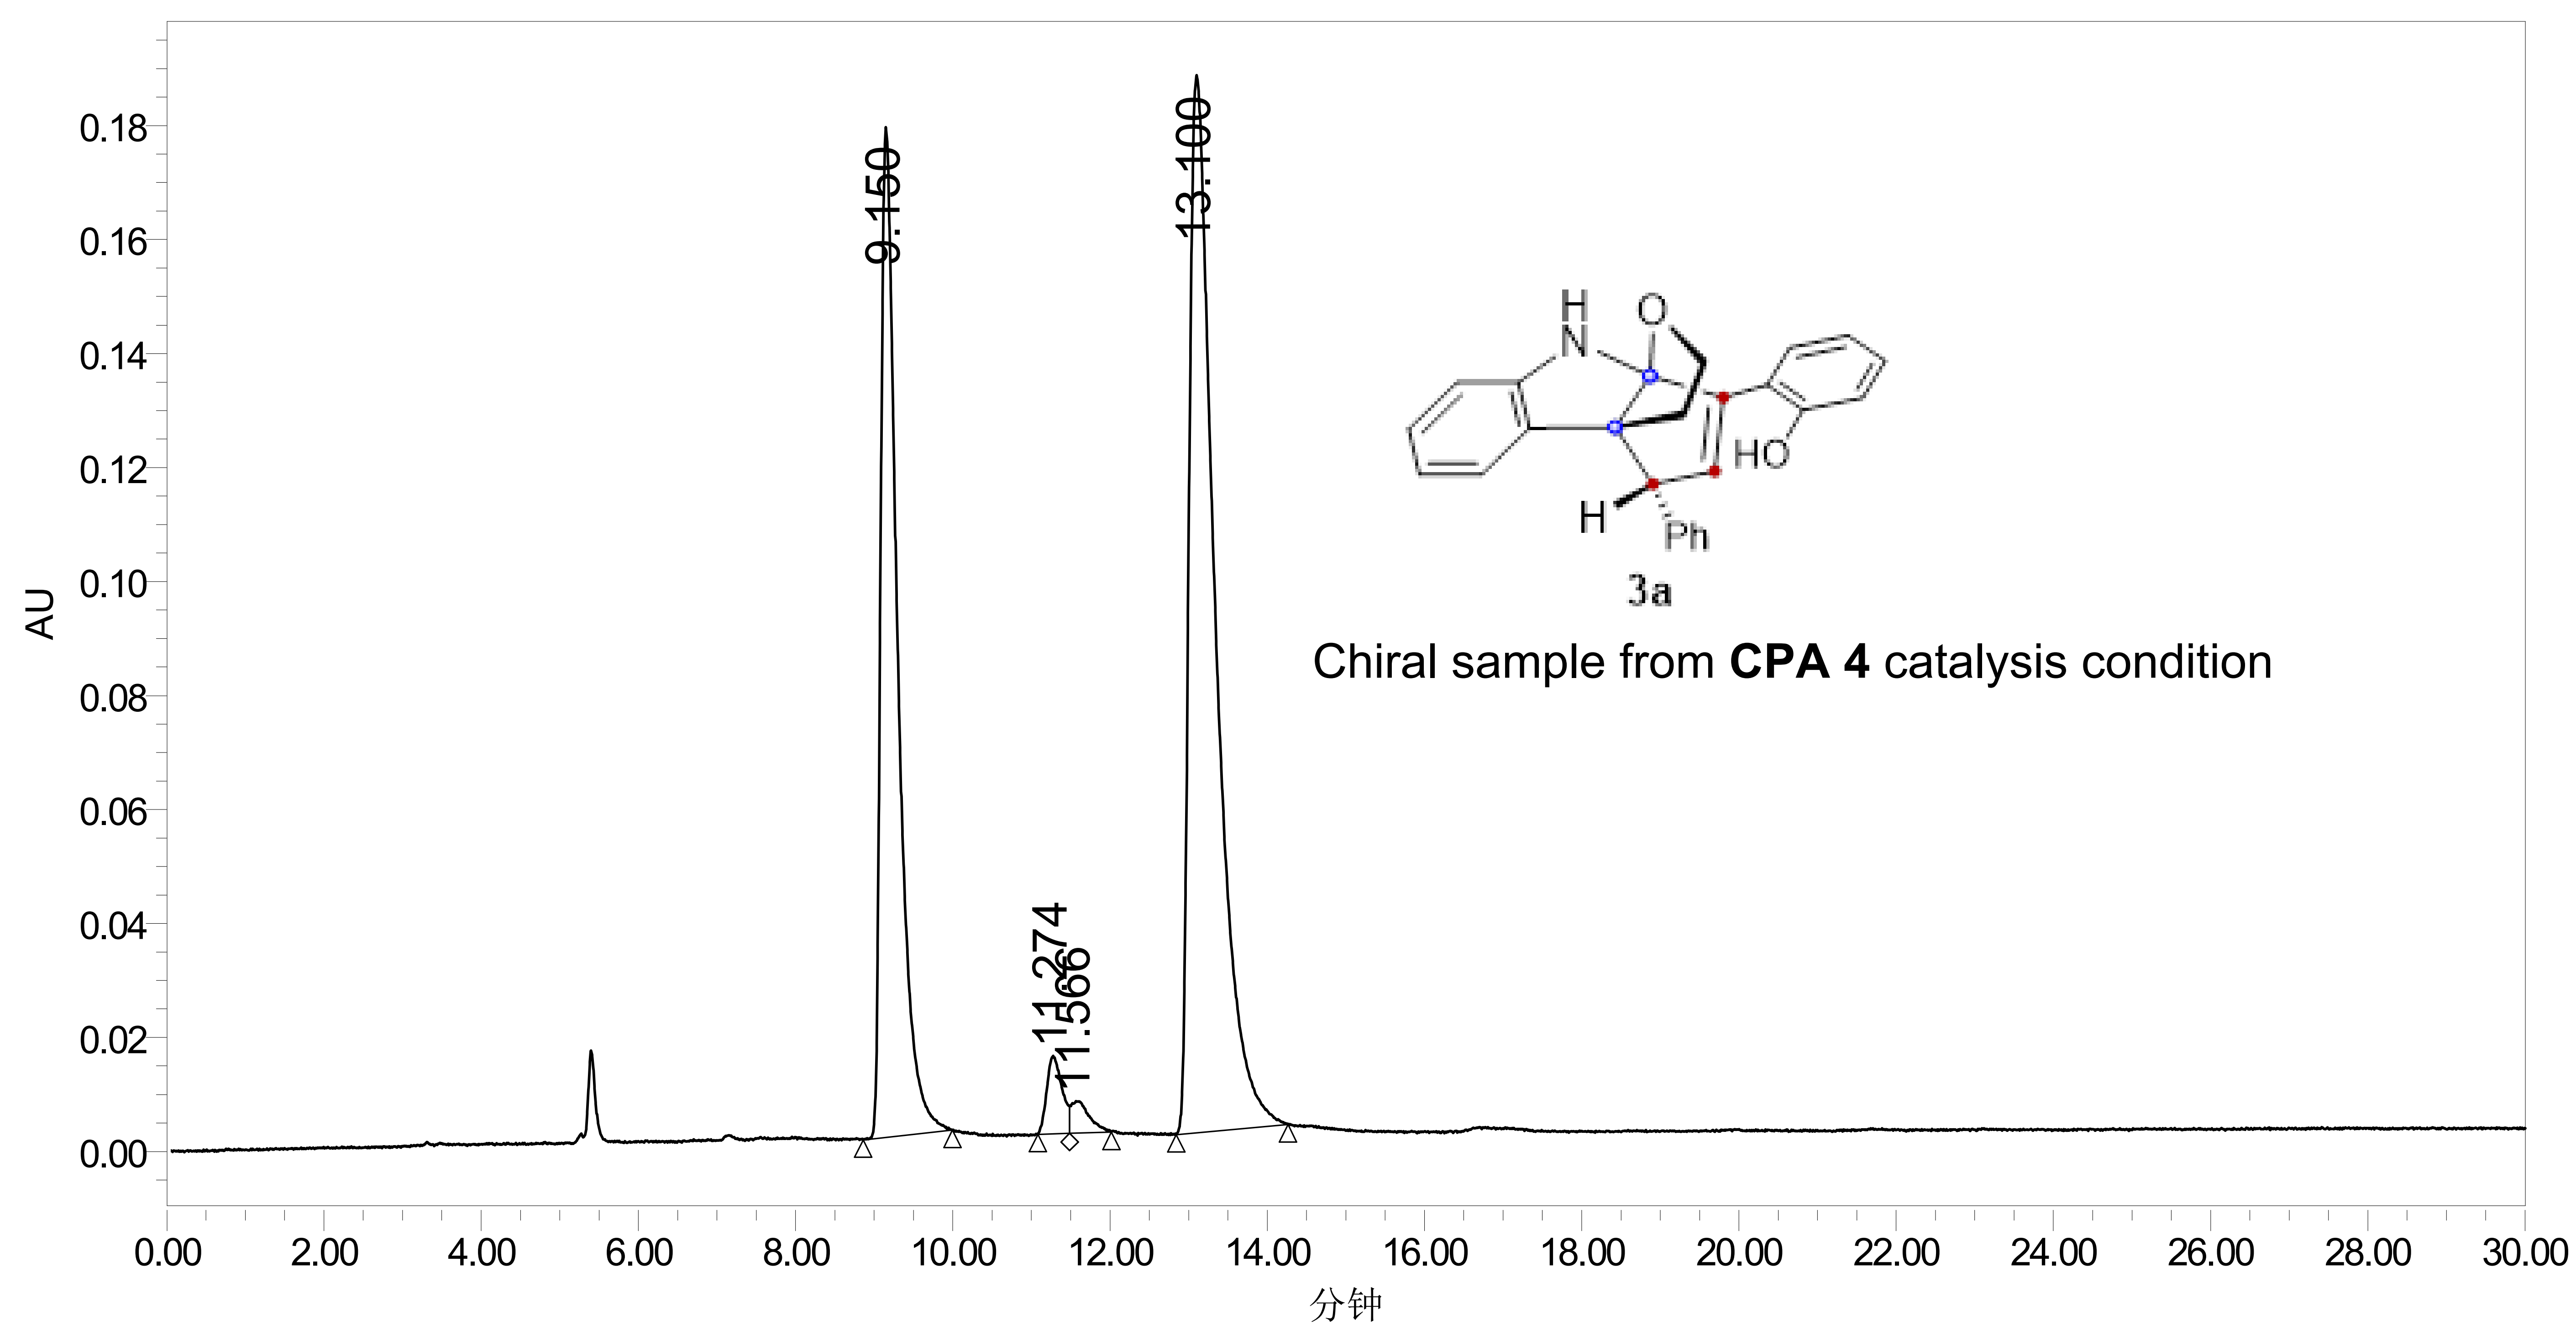

|   | 保留时间<br>(分钟) | 面积<br>(微伏*秒) | % 面积  | 高度<br>(微伏) | % 高度  |
|---|--------------|--------------|-------|------------|-------|
| 1 | 9.150        | 2670154      | 36.83 | 177237     | 46.39 |
| 2 | 11.274       | 186482       | 2.57  | 13643      | 3.57  |
| 3 | 11.566       | 91631        | 1.26  | 5634       | 1.47  |
| 4 | 13.100       | 4302637      | 59.34 | 185537     | 48.56 |
